# 1 Fast and Accurate Influenza Forecasting in the United States 2 with Inferno

3 Dave Osthus

4 Los Alamos National Laboratory, Statistical Sciences Group

## 6 Abstract

7 Infectious disease forecasting is an emerging field and has the potential to improve public  
8 health through anticipatory resource allocation, situational awareness, and mitigation plan-  
9 ning. By way of exploring and operationalizing disease forecasting, the U.S. Centers for  
10 Disease Control and Prevention (CDC) has hosted FluSight since the 2013/14 flu season,  
11 an annual flu forecasting challenge. Since FluSight's onset, forecasters have developed and  
12 improved forecasting models in an effort to provide more timely, reliable, and accurate infor-  
13 mation about the likely progression of the outbreak. While improving the predictive perfor-  
14 mance of these forecasting models is often the primary objective, it is also important for a  
15 forecasting model to run quickly, facilitating further model development, improvement, and  
16 scalability. In this vein I introduce Inferno, a fast and accurate flu forecasting model inspired  
17 by Dante, the top performing model in the 2018/19 FluSight challenge. When compared to  
18 all models that participated in FluSight 2018/19, Inferno would have placed 2nd in both the  
19 national and state challenges, behind only Dante. Inferno, however, runs in minutes and is  
20 trivially parallelizable, while Dante takes hours to run, representing a significant operational  
21 improvement with minimal impact to performance. A future consideration for forecasting  
22 competitions like FluSight will be how to encourage improvements to secondarily important  
23 properties of forecasting models, such as runtime, generalizability, and interpretability.

## 24 1 Introduction

25 Infectious disease outbreaks can be disruptive, deadly, and complex. By the end of November  
26 2020, COVID-19 had killed almost 1.5 million people globally and over 250 thousand people in  
27 the United States (U.S.) [6]. Each year in the U.S., seasonal influenza kills tens of thousands  
28 of people and hospitalizes hundreds of thousands [25]. Life saving resources, such as respira-  
29 tors, antivirals, vaccines, and medical professionals must be allocated to ensure locations are

30 prepared and ready for the impending outbreak.

31 This is where infectious disease forecasting comes in. If forecasts can reliably anticipate  
32 the progression of an outbreak, we may be better prepared to confront it when it arrives.  
33 Infectious disease forecasting is still relatively young, but can no longer claim novelty. There  
34 has been a flurry of infectious disease forecasting challenges/collaborations in the last ten  
35 years, including the Defense Advanced Research Projects Agency’s 2014/15 Chikungunya  
36 challenge [5], a collection of vector-borne disease challenges hosted by the U.S. Centers for  
37 Disease Control and Prevention (CDC) for dengue (2015) [9], Aedes (2019) [23], and West Nile  
38 virus (2020) [24], the U.S. CDC COVID-19 forecasting collaboration (2020) [27], and the U.S.  
39 CDC’s flagship influenza forecasting challenge, FluSight, held annually since the 2013/14 flu  
40 season. The FluSight challenge alone has resulted in a wave of infectious disease forecasting  
41 model development [13, 12, 11, 14, 20, 19, 4, 3, 10, 15, 1, 28, 26].

42 The organizing body of a forecasting challenge (in the case of FluSight, the U.S. CDC)  
43 provides immense operational and research value by determining forecasting targets of public  
44 health relevance through interactions with their state and local public health partners, iden-  
45 tifying relevant data sources and making them publicly available to forecasters, and defining  
46 the forecast evaluation criteria — a more challenging task than it may first appear (see [2]  
47 and [21]).

48 For instance, the FluSight challenge asks forecasters to predict seven targets on a weekly  
49 basis throughout the flu season: 1 through 4-week-ahead forecasts of influenza-like illness  
50 (ILI), the week of flu season onset, the week the flu season will peak, and the peak value  
51 of ILI for the flu season. Forecasts are made for states, Health and Human Services (HHS)  
52 regions, and the United States. ILI data collected by the U.S. Outpatient Influenza-like Illness  
53 Surveillance Network (ILINet) are used for forecasting; targets are defined as summaries of ILI  
54 data. FluSight uses the log scoring rule to evaluate forecasts. The log scoring rule evaluates  
55 probabilistic forecasts, requiring forecasters to not only provide a prediction of what they think  
56 will happen in the future but also quantify how sure they are of that. The choice made by the  
57 U.S. CDC to use a log scoring rule makes clear their position that uncertainty quantification  
58 is of value to public health. Given a set of forecasting targets and an evaluation metric,  
59 forecasters develop models capable of forecasting the targets with the goal of maximizing  
60 their forecast evaluation score.

61 While a forecasting model’s predictive performance is and should be of primary impor-  
62 tance, it is not exclusively important. This seems obvious upon even cursory consideration.  
63 For instance, all else equal, an interpretable forecasting model is better than a black box fore-  
64 casting model. All else equal, a generalizable forecasting model applicable to many disease  
65 forecasting contexts is better than a highly-tailored model to a specific disease context. All  
66 else equal, a forecasting model that runs quickly and is scalable is better than one that is  
67 slow and computationally expensive. While all of these seem obvious, none of these secondary  
68 factors are incorporated into FluSight’s forecast evaluation criteria; it *only* measures the pre-

69 dictive performance of the model. As a result, much of the forecasting research of the past  
70 decade has focused more on developing models that improve forecasting scores and less on  
71 developing models that are generalizable, interpretable, scalable, and fast.

72 In this paper, I focus on improving the runtime of flu forecasting models while main-  
73 taining high prediction standards with the presentation of Inferno, a fast and accurate flu  
74 forecasting model. Inferno is a parallelizable, empirical Bayesian forecasting model inspired  
75 by Dante, the top performing model in FluSight 2018/19 [14]. The achieved goal of Inferno  
76 is to maintain the high predictive performance of Dante but substantially decrease the run-  
77 time. As will be discussed later, Inferno would have placed 2nd only to Dante in the 2018/19  
78 FluSight challenge, but runs in minutes rather than hours, constituting a significant speed-up  
79 in operational performance.

80 In the remainder of this paper, I describe the details to Inferno (Section 2) and present  
81 Inferno’s forecasting performance as compared to all participating models in FluSight 2018/19  
82 (Section 3). I conclude the paper by raising important questions the infectious disease fore-  
83 casting community must grapple with in order to improve the utility for forecasting challenges  
84 for public health.

## 85 2 Methods

### 86 2.1 Dante Background

87 Dante is a multiscale, probabilistic, influenza forecasting model. Dante has two sub-models: a  
88 state forecasting model and an aggregation model which combines state forecasts to produce  
89 HHS regional and United States forecasts. The state forecasting model is a statistical model  
90 where the expectation of ILI on a given week, state, and season is modeled as a function  
91 of four components: an overall trend component, a state-specific deviation component, a  
92 season-specific deviation component, and a state/season-specific deviation component. These  
93 four components are each modeled as random or reverse-random walks — flexible time series  
94 models that capture temporal correlation. By modeling all states and past flu seasons jointly,  
95 Dante achieves self-consistency and is able to borrow information across seasons and space.  
96 By modeling the HHS regional and United States forecasts as U.S. Census weighted averages  
97 of state forecasts, Dante ensures self-consistency across geographic scales. For more details  
98 on Dante, see [14].

99 Dante is a fully Bayesian model, capturing uncertainty in all model parameters, latent  
100 states, and forecasts through its posterior (predictive) distribution. The fully Bayesian for-  
101 mulation and self-consistency of Dante comes at a computational price, however. Dante  
102 represents a large model that will grow each year as more historical data are added and is  
103 not well-positioned to scale with possible future changes/expansions to FluSight (e.g., county-  
104 level forecasting). Nothing is precomputed and due to its interconnected model structure, it

105 is not obvious how to break up Dante to exploit parallelization.

106 Inferno was developed to address these computational shortcomings. Inferno is an em-  
 107 pirical Bayesian analogue to the fully Bayesian Dante, where instead of modeling historical flu  
 108 seasons directly, Inferno uses historical flu seasons to precompute model parameters. Inferno  
 109 trades in self-consistency for parallelization, allowing all states, HHS regions, and the United  
 110 States to be fit independently. In Section 2.2, I describe the Inferno forecasting model.

## 111 2.2 Inferno

112 Let  $y_t \in (0, 1)$  for  $t = 1, 2, \dots, T$  be ILI/100 for states or state-weighted ILI/100 for HHS  
 113 regions or the United States (collectively referred to as (w)ILI) for week of season  $t$ , where  
 114  $t = 1$  corresponds to Morbidity and Mortality Weekly Report (MMWR) week 40, roughly the  
 115 beginning of October, and  $T = 35$  roughly corresponds to the end of May. Inferno’s generative  
 116 model is defined as follows:

$$y_t | \theta_t, \alpha \sim \text{Beta}(\alpha \theta_t, \alpha(1 - \theta_t)) \quad (1)$$

$$\theta_t = \text{logit}^{-1}(\gamma_t + \delta_t) \quad (2)$$

$$\boldsymbol{\delta} | \boldsymbol{\mu}, \boldsymbol{\Sigma} \sim \text{GP}(\boldsymbol{\mu}, \boldsymbol{\Sigma}) \quad (3)$$

$$\mu | \sigma_\mu^2 \sim N(0, \sigma_\mu^2) \quad (4)$$

$$\Sigma_{i,i} = \sigma_\Sigma^2 \quad (5)$$

$$\Sigma_{i,j \neq i} = \phi \sigma_\Sigma^2 \exp(-\lambda(i - j)^2), \quad (6)$$

117 where  $y_t$  is the noisy but observable measurement of ILI/100 on week  $t$ ,  $\theta_t$  is the true but  
 118 unobservable value of ILI/100 on week  $t$ ,  $\boldsymbol{\delta} = (\delta_1, \delta_2, \dots, \delta_T)'$  is a  $T \times 1$  vector,  $\mathbf{1}$  is a  $T \times 1$   
 119 vector of 1s,  $\boldsymbol{\Sigma}$  is a  $T \times T$  positive semi-definite matrix,  $\text{GP}(\boldsymbol{\mu}, \boldsymbol{\Sigma})$  is a Gaussian process (GP)  
 120 with mean  $\boldsymbol{\mu}$  and covariance  $\boldsymbol{\Sigma}$ , the scalar parameters  $\alpha$ ,  $\sigma_\mu^2$ ,  $\sigma_\Sigma^2$ ,  $\lambda$  are all greater than 0,  
 121 and  $\phi \in [0, 1]$ . In this paper, bold quantities represent vectors or matrices, while non-bold  
 122 quantities represent scalars. The Beta distribution of Equation 1 requires  $y_t \in (0, 1)$ . Thus,  
 123 all  $y_t$  below a low threshold  $l$  are set equal to  $l$  and all  $y_t$  above  $1 - l$  are set to  $1 - l$ . For this  
 124 work,  $l = 0.0005$ .

125 Inferno takes an empirical Bayesian approach, where unknown parameters are estimated  
 126 from historical training data. The following outlines a six step procedure to estimate the  
 127 unknown parameters  $\alpha$ ,  $\boldsymbol{\gamma} = (\gamma_1, \gamma_2, \dots, \gamma_T)'$ ,  $\sigma_\mu^2$ ,  $\sigma_\Sigma^2$ ,  $\lambda$ , and  $\phi$  and to use Markov chain  
 128 Monte Carlo (MCMC) to sample and forecast from Inferno’s posterior predictive distribution.

### 129 2.2.1 Step 1: Estimate $\theta_{s,t}$

130 For a given geographical unit (e.g., state, region country), let  $y_{s,t}$  by (w)ILI for training season  
 131  $s \in 1, 2, \dots, S$  and week of season  $t$ . Fit  $\hat{\beta}_{s,t}$  as a 3-week moving average:

$$\hat{\beta}_{s,1} = \frac{1}{2}(y_{s,1} + y_{s,2}) \quad (7)$$

$$\hat{\beta}_{s,t \neq 1,T} = \frac{1}{3}(y_{s,t-1} + y_{s,t} + y_{s,t+1}) \quad (8)$$

$$\hat{\beta}_{s,T} = \frac{1}{2}(y_{s,T-1} + y_{s,T}). \quad (9)$$

132 Figure 1 shows the moving average fit to ILI in Illinois. By construction, the moving average  
 133 captures the shape of the ILI curve. The moving average, however, can miss sharp changes  
 134 in ILI caused by differences in reporting practices over holidays. For instance, we see that  
 135 the moving average most often underestimates ILI the week of Christmas ( $t = 13$ , or MMWR  
 136 week 52).

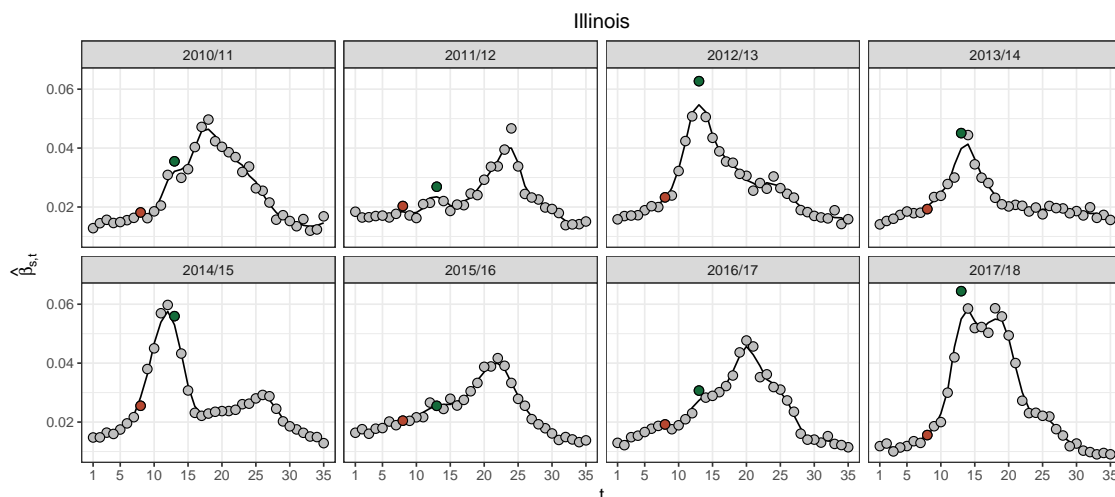

Figure 1: ILI (grey points) and  $\hat{\beta}_{s,t}$  (black line) for the historical seasons for Illinois. ILI for the week of Thanksgiving ( $t = 8$ ) and Christmas ( $t = 13$ ) are highlighted in brown and green, respectively.  $\hat{\beta}_{s,t}$  typically underestimates the sharp uptick in ILI observed on Christmas and to a lesser extent Thanksgiving, which is likely a result of changes in reporting and care-seeking behavior over the holidays.

137 To capture the systematic sharp changes in ILI that are common across training seasons,  
 138 Inferno computes the quantity  $\tau_t$ :

$$\hat{\tau}_t = \frac{1}{S} \sum_{s=1}^S (y_{s,t} - \hat{\beta}_{s,t}). \quad (10)$$

139 Figure 2 plots  $\tau_t$  for all states.  $\tau_t$  captures the holiday effects in ILI, with a small but consistent  
 140 positive  $\tau_t$  on the week of Thanksgiving ( $t = 8$ , or MMWR week 47) and a larger positive  
 141 effect the week of Christmas.

142 Finally, the quantity  $\theta_{s,t}$  captures both the ILI profile ( $\hat{\beta}_{s,t}$ ) and the holiday effects ( $\hat{\tau}_t$ ):

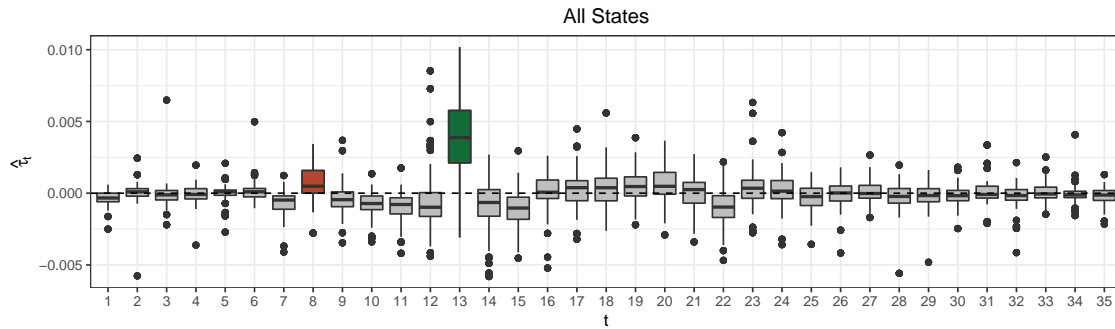

Figure 2: The quantity  $\hat{\tau}_t$  for all states.  $\hat{\tau}_t$  the week of Thanksgiving (brown) and Christmas (green) are systematically positive, likely as a result of systematic changes to reporting and care-seeking behavior over the holidays.

$$\hat{\theta}_{s,t} = \begin{cases} l & \text{if } \hat{\beta}_{s,t} + \hat{\tau}_t < l \\ 1 - l & \text{if } \hat{\beta}_{s,t} + \hat{\tau}_t > 1 - l \\ \hat{\beta}_{s,t} + \hat{\tau}_t & \text{otherwise.} \end{cases} \quad (11)$$

143 Figure 3 shows how  $\hat{\theta}_{s,t}$  tracks the profile of the ILI season, like  $\hat{\beta}_{s,t}$ , but better tracks ILI on the holidays, especially Christmas.

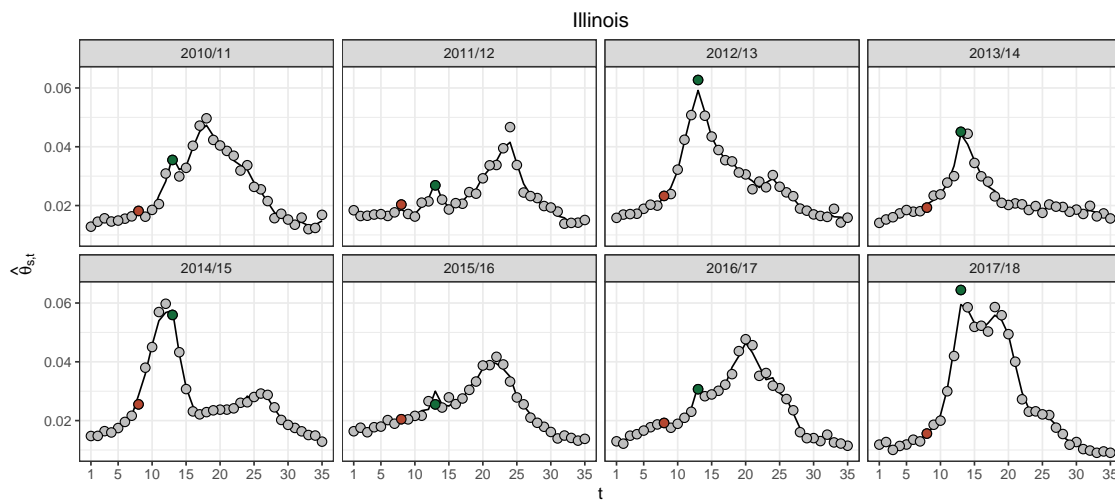

Figure 3: ILI (grey points) and  $\hat{\theta}_{s,t}$  (black line) for the historical seasons for Illinois. ILI for the week of Thanksgiving ( $t = 8$ ) and Christmas ( $t = 13$ ) are highlighted in brown and green, respectively.  $\hat{\theta}_{s,t}$  better matches ILI data on the holidays than  $\hat{\beta}_{s,t}$  (Figure 1) by accounting for the systematic reporting and care-seeking changes over the holidays, as accounted for by  $\hat{\tau}_t$ .

144

145 **2.2.2 Step 2: Estimate  $\alpha$**

146 Inferno estimates  $\hat{\theta}_{s,t}$  in order to facilitate the estimation of the other unknown quantities  
 147 of Inferno’s generative model. The expectation and the variance of Inferno’s data model  
 148 (Equation 1) are,

$$E(y_t|\theta_t, \alpha) = \theta_t \quad (12)$$

$$\text{Var}(y_t|\theta_t, \alpha) = \frac{\theta_t(1 - \theta_t)}{1 + \alpha}. \quad (13)$$

149 The parameter  $\alpha$  controls the variance of the data model, capturing the week-to-week vari-  
 150 ability in the ILI data. The larger  $\alpha$  is, the smaller the variance reflecting less week-to-week  
 151 noise in the ILI data. The smaller  $\alpha$  is, the larger the variance reflecting more week-to-week  
 152 noise in the ILI data. We estimate  $\alpha > 0$  as the maximum likelihood estimate (MLE) of  
 153 Inferno’s data model by minimizing the negative log likelihood:

$$\hat{\alpha} = \underset{\alpha}{\text{argmin}} \sum_{s=1}^S \sum_{t=1}^T -\log(\text{Beta}(y_{s,t}|\hat{\theta}_{s,t}, \alpha)), \quad (14)$$

154 where  $\log(x)$  is the natural log of  $x$ ,

$$\text{Beta}(y_{s,t}|\hat{\theta}_{s,t}, \alpha) = \frac{y_{s,t}^{a-1}(1 - y_{s,t})^{b-1}}{B(a, b)} \quad (15)$$

$$B(a, b) = \frac{\Gamma(a)\Gamma(b)}{\Gamma(a + b)} \quad (16)$$

$$a = \alpha\hat{\theta}_{s,t} \quad (17)$$

$$b = \alpha(1 - \hat{\theta}_{s,t}), \quad (18)$$

155 and  $\Gamma()$  is the gamma function.

156 The top of Figure 4 shows  $\hat{\alpha}$  for all states, territories, and cities (collectively referred to as  
 157 states). States like the U.S. Virgin Islands, North Dakota, and Puerto Rico have the smallest  
 158  $\hat{\alpha}$ s, reflecting they have the largest week-to-week noise in their ILI data, while states like  
 159 California, Illinois, and New York City have the largest  $\hat{\alpha}$ s, reflecting they have the smallest  
 160 week-to-week noise in their ILI data. The bottom of Figure 4 shows the 95% prediction  
 161 interval for  $\text{Beta}(\hat{\alpha}\hat{\theta}_{s,t}, \hat{\alpha}(1 - \hat{\theta}_{s,t}))$  for North Dakota, Nevada, and Illinois, illustrating the  
 162 different levels of week-to-week noise in ILI data across states.

163 **2.2.3 Step 3: Estimate  $\gamma_t$**

164 Seasonal flu has a typical shape to it in the United States. ILI starts at low levels early in the  
 165 season, rises to a peak between December and March, and reverts to low levels by the end  
 166 of May. The role of  $\gamma$  is to capture this typical seasonal flu profile. Inferno computes  $\gamma_t$  as  
 167 follows:

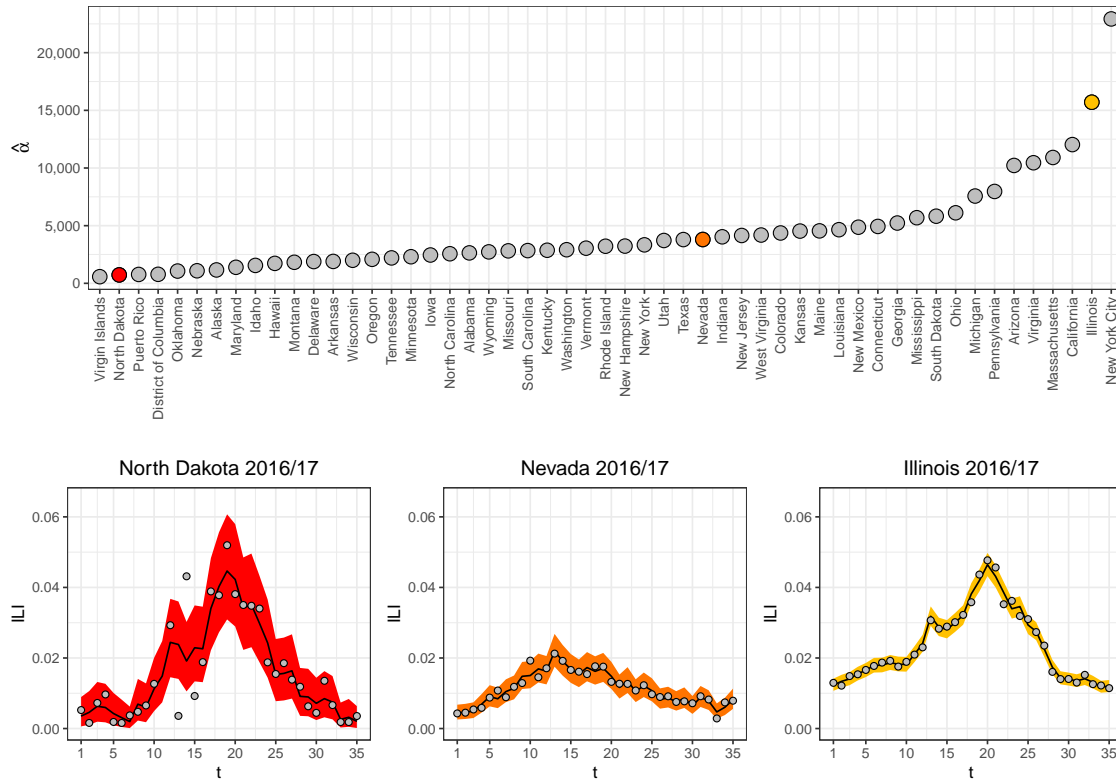

Figure 4: (Top)  $\hat{\alpha}$  for all states based on training data from 2010/2011 through 2017/18. (Bottom) ILI (grey points),  $\hat{\theta}_{s,t}$  (black line) and 95% prediction interval for  $\text{Beta}(\hat{\alpha}\hat{\theta}_{s,t}, \hat{\alpha}(1 - \hat{\theta}_{s,t}))$  (ribbon) for North Dakota, Nevada, and Illinois in 2016/17.  $\hat{\alpha}$  captures the week-to-week noise in ILI data that systematically varies from state-to-state, where North Dakota has more week-to-week noise than Illinois.

$$\hat{\gamma}_t = \frac{1}{S} \sum_{s=1}^S \text{logit}(\hat{\theta}_{s,t}), \quad (19)$$

168 where  $\text{logit}(p) = \log(p/(1-p))$ .

169 Figure 5 shows  $\hat{\gamma}$  for North Dakota, Nevada, and Illinois. We see for all states,  $\hat{\gamma}$  captures  
 170 the typical profile of seasonal flu on the logit scale, with low levels at the beginning of the flu  
 171 season, ramping up to a peak in the middle, then reverting back to low levels by the end.

#### 172 2.2.4 Step 4: Estimate $\sigma_\mu^2$

173 Equation 2 is the mean of Inferno's data model. While  $\gamma$  captures the typical profile of seasonal  
 174 flu,  $\delta$  captures season-specific deviations from  $\gamma$ . Inferno models  $\delta$  with a Gaussian process  
 175 (GP), a stochastic process where any finite collection of random variables has a multivariate  
 176 normal distribution. That is,



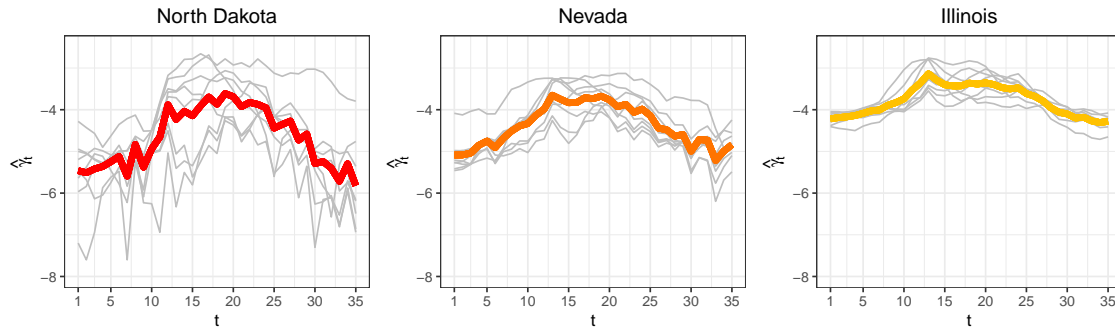

Figure 5:  $\hat{\gamma}$  (colored line) and  $\text{logit}(\hat{\theta}_s)$  (grey lines) for North Dakota, Nevada, and Illinois.  $\hat{\gamma}$  captures the typical profile of seasonal flu specific to each state on the logit scale.

$$\text{GP}(\boldsymbol{\delta}|\boldsymbol{\mu}\mathbf{1}, \boldsymbol{\Sigma}) = (2\pi)^{-T/2}|\boldsymbol{\Sigma}|^{-1/2}\exp\left(-\frac{1}{2}(\boldsymbol{\delta} - \boldsymbol{\mu}\mathbf{1})'\boldsymbol{\Sigma}^{-1}(\boldsymbol{\delta} - \boldsymbol{\mu}\mathbf{1})\right), \quad (20)$$

177 where  $\mathbf{1}$  is a  $T \times 1$  vector of ones,  $\boldsymbol{\Sigma}$  is a  $T \times T$  positive semi-definite matrix,  $|\boldsymbol{\Sigma}|$  is the  
178 determinant of  $\boldsymbol{\Sigma}$ , and  $\boldsymbol{\Sigma}^{-1}$  is the inverse of  $\boldsymbol{\Sigma}$ . The model for the mean of the GP  $\boldsymbol{\mu}$  is

$$\boldsymbol{\mu} \sim N(0, \sigma_\mu^2). \quad (21)$$

179 Step 4 describes how to estimate  $\sigma_\mu^2$ .

180 First compute the following quantities:

$$\hat{\delta}_{s,t} = \text{logit}(\hat{\theta}_{s,t}) - \hat{\gamma}_t \quad (22)$$

$$\hat{\mu}_s = \frac{1}{T} \sum_{t=1}^T \hat{\delta}_{s,t}. \quad (23)$$

181 The top of Figure 6 shows  $\hat{\delta}_s$  and  $\hat{\mu}_s$  for North Dakota, Nevada and Illinois. The quantity  $\hat{\mu}_s$   
182 captures how far, on average,  $\hat{\delta}_s$  deviates from  $\mathbf{0}$ .

183 The quantity  $\hat{\sigma}_\mu^2$  is computed as the unbiased sample variance of  $\hat{\boldsymbol{\mu}}$ :

$$\hat{\sigma}_\mu^2 = \frac{1}{S-1} \sum_{s=1}^S \left( \hat{\mu}_s - \frac{1}{S} \sum_{s=1}^S \hat{\mu}_s \right)^2. \quad (24)$$

184 The bottom of Figure 6 shows  $\hat{\sigma}_\mu^2$  for all states. Some states, like North Dakota, have appreciable  
185 average season-to-season variation while other states, like Illinois, have smaller average  
186 season-to-season deviations from their typical seasonal flu profiles.

### 187 2.2.5 Step 5: Estimate $\sigma_\Sigma^2$ , $\lambda$ , $\phi$

188 Step 5 estimates the covariance parameters in  $\boldsymbol{\Sigma}$ . The covariance matrix captures different  
189 characteristics of  $\boldsymbol{\delta}$ . Recall Equations 5 and 6:

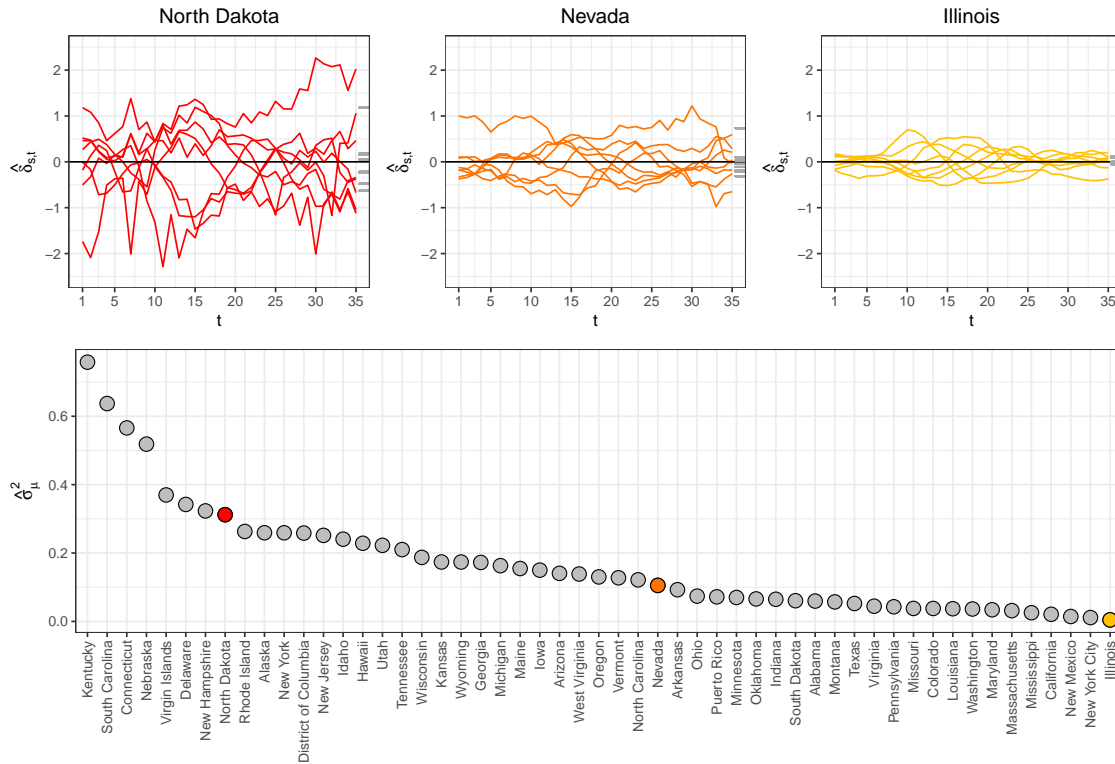

Figure 6: (Top)  $\hat{\delta}_s$  (colored lines) and  $\hat{\mu}_s$  (grey tick marks) for North Dakota, Nevada, and Illinois. North Dakota exhibits more season-to-season variability in  $\hat{\mu}_s$  than Illinois, as can be seen in the spread of  $\hat{\mu}_s$ . (Bottom)  $\hat{\sigma}_\mu^2$  for all states. Considerable variation in  $\hat{\sigma}_\mu^2$  across states is observed.

$$\Sigma_{i,i} = \sigma_\Sigma^2$$

$$\Sigma_{i,j \neq i} = \phi \sigma_\Sigma^2 \exp(-\lambda(i-j)^2).$$

190 The parameter  $\sigma_\Sigma^2$  is the marginal variance for the GP. It captures how far  $\delta - \mu \mathbf{1}$  typically  
 191 deviates from 0. The top of Figure 7 plots  $\hat{\delta}_s - \hat{\mu}_s \mathbf{1}$  for North Dakota, Nevada, and Illinois.  
 192 North Dakota exhibits more variability than Illinois as can be seen with its wider range of  
 193 values. Inferno estimates  $\sigma_\Sigma^2$  as

$$\hat{\sigma}_\Sigma^2 = \frac{1}{ST-1} \sum_{s=1}^S \sum_{t=1}^T (\hat{\delta}_{s,t} - \hat{\mu}_s)^2. \quad (25)$$

194 The remaining parameters of  $\Sigma$  are  $\phi$  and  $\lambda$ . They collectively capture two different  
 195 characteristics of  $\delta$ . The parameter  $\phi$  captures the smoothness of  $\delta$ . For instance,  $\hat{\delta}_s$  for  
 196 Illinois in Figure 6 are much smoother than  $\hat{\delta}_s$  for North Dakota. The parameter  $\phi$  captures  
 197 this feature, with  $\phi$  close to 1 resulting in smoother  $\delta$ s. The second characteristic of  $\delta$  captured  
 198 by  $\phi$  and  $\lambda$  is the correlation between entries of  $\delta$ . For instance, the correlation between  $\delta_i$

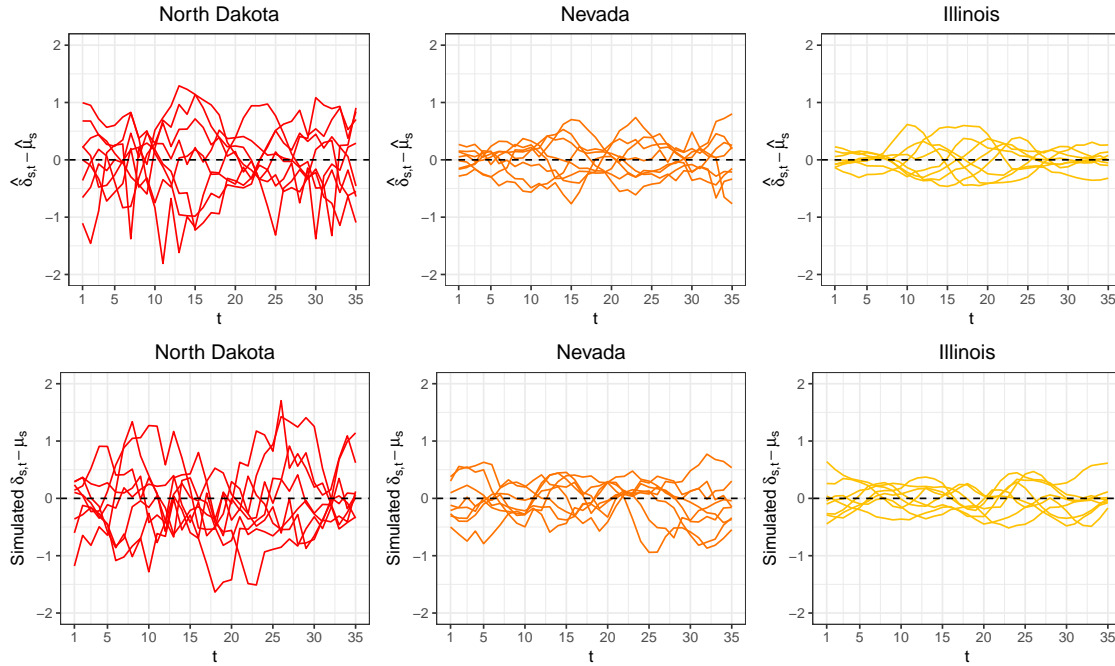

Figure 7: (Top row) The estimated times series from training data for the quantities  $\hat{\delta}_s - \hat{\mu}_s \mathbf{1}$ . (Bottom row) Realizations drawn from  $\text{GP}(\mathbf{0}, \hat{\Sigma})$ . Good visual agreement is seen between the simulated  $\delta_s - \mu_s \mathbf{1}$  and the  $\hat{\delta}_s - \hat{\mu}_s \mathbf{1}$  calculated from training data, suggesting the Gaussian process is able to capture heterogenous discrepancy characteristics across states.

199 and  $\delta_{i+1}$  is

$$\text{Cor}(\delta_i, \delta_{i+1}) = \frac{\text{Cov}(\delta_i, \delta_{i+1})}{\sqrt{\text{Var}(\delta_i)}\sqrt{\text{Var}(\delta_{i+1})}} = \frac{\sigma_\Sigma^2 \phi \exp(-\lambda(i - (i+1))^2)}{\sigma_\Sigma^2} = \phi \exp(-\lambda). \quad (26)$$

200 Inferno estimates  $\phi$  and  $\lambda$  by minimizing the negative log likelihood:

$$\hat{\lambda}, \hat{\phi} = \underset{\lambda, \phi}{\text{argmin}} \sum_{s=1}^S -\log \left( \text{GP}(\hat{\delta}_s | \hat{\mu}_s, \hat{\sigma}_\Sigma^2, \lambda, \phi) \right). \quad (27)$$

201 Figure 8 plots the covariance parameter estimates for all states. North Dakota has larger  
 202 marginal variance (larger  $\hat{\sigma}_\Sigma^2$ ), less smoothness (smaller  $\hat{\phi}$ ), and lower correlation (smaller  
 203  $\hat{\phi} \exp(-\hat{\lambda})$ ) than Illinois.

204 The bottom of Figure 7 shows realizations drawn from  $\text{GP}(\mathbf{0}, \hat{\Sigma})$ . The fitted GP does a  
 205 good job capturing the different characteristics of the empirical quantities  $\hat{\delta}_s - \hat{\mu}_s \mathbf{1}$ , suggesting  
 206 the GP is a defensible generative model for  $\delta$ .

### 207 2.2.6 Step 6: Sample Forecasts from Inferno

208 The sixth and final step of Inferno is to replace parameters with their estimates and sample  
 209 from the posterior predictive distribution. Specifically, the generative model with parameters

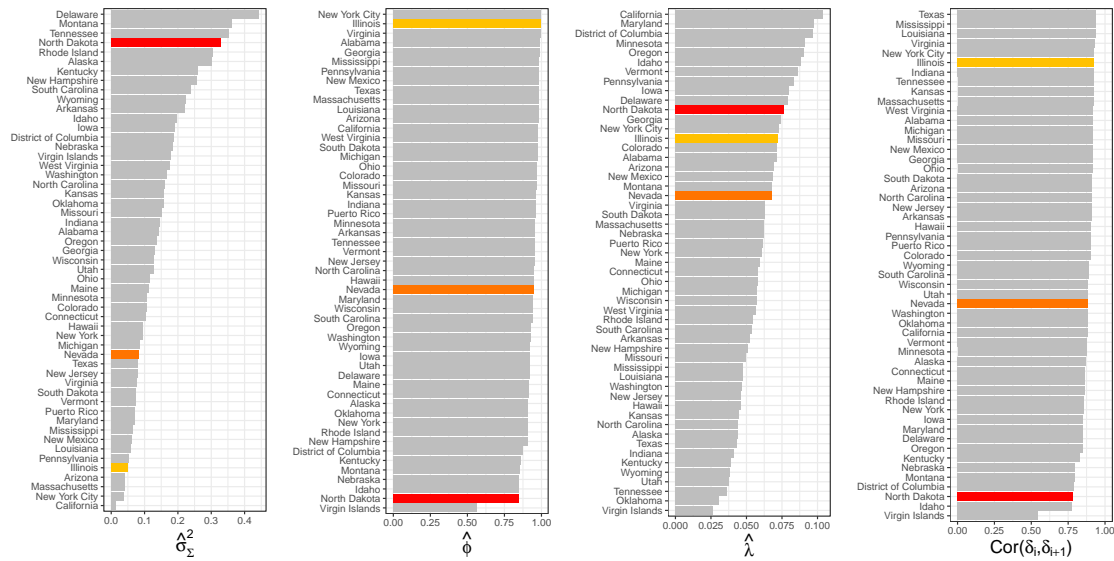

Figure 8: Estimated GP covariance parameter estimates for all states. Parameter estimates for North Dakota, Nevada, and Illinois are highlighted in red, orange, and yellow, respectively. North Dakota has larger marginal variance (larger  $\hat{\sigma}_{\Sigma}^2$ ), less smoothness (smaller  $\hat{\phi}$ ), and lower correlation (smaller  $\text{Cor}(\delta_i, \delta_{i+1})$ ) than Illinois.

210 replaced by their estimates is

$$y_t | \theta_t \sim \text{Beta}(\hat{\alpha}\theta_t, \hat{\alpha}(1 - \theta_t)) \quad (28)$$

$$\theta_t = \text{logit}^{-1}(\hat{\gamma}_t + \delta_t) \quad (29)$$

$$\delta | \mu \sim \text{GP}(\mu \mathbf{1}, \hat{\Sigma}) \quad (30)$$

$$\mu \sim N(0, \hat{\sigma}_{\mu}^2) \quad (31)$$

$$\hat{\Sigma}_{i,i} = \hat{\sigma}_{\Sigma}^2 \quad (32)$$

$$\hat{\Sigma}_{i,j \neq i} = \hat{\phi} \hat{\sigma}_{\Sigma}^2 \exp(-\hat{\lambda}(i - j)^2). \quad (33)$$

211 Inferno forecasts the entire flu season by sampling from the posterior predictive distribution  
 212 given the first  $t$  weeks of ILI observations:

$$[\tilde{y} | \mathbf{y}_{1:t}] = \int [\tilde{y}, \theta | \mathbf{y}_{1:t}] d\theta = \int [\tilde{y} | \theta] [\theta | \mathbf{y}_{1:t}] d\theta, \quad (34)$$

213 where  $[X|Y]$  is the conditional distribution of  $X$  given  $Y$  and  $\tilde{y}$  is assumed to be independent  
 214 of  $\mathbf{y}$ , given  $\theta$  where  $\theta$  generically represents all parameters and latent states of Inferno. The  
 215 posterior predictive distribution of Equation 34 is not known in closed form. Markov chain  
 216 Monte Carlo (MCMC) sampling is used to draw from the posterior predictive distribution.  
 217 The probabilistic programming language JAGS (Just Another Gibbs Sampler) [16] is used to  
 218 execute the MCMC sampling. JAGS is called with functions from the `rjags` package [17] in

219 the programming language R [18]. The results are  $J$  draws from the posterior predictive dis-  
 220 tribution of Equation 34. For this paper, forecasts are based on  $J = 25,000$  draws, discarding  
 221 the first 12,500 draws as burn-in and thinning the remaining 12,500 draws by two, resulting  
 222 in forecasts based on 6,250 MCMC draws. The JAGS code that implements Inferno can be  
 223 found in Appendix A.

224 Figure 9 shows the forecasts for North Dakota, Nevada, and Illinois throughout the 2018/19  
 225 flu season. The posterior predictive mean and the 95% posterior prediction interval are shown  
 226 as summaries of the forecasts.

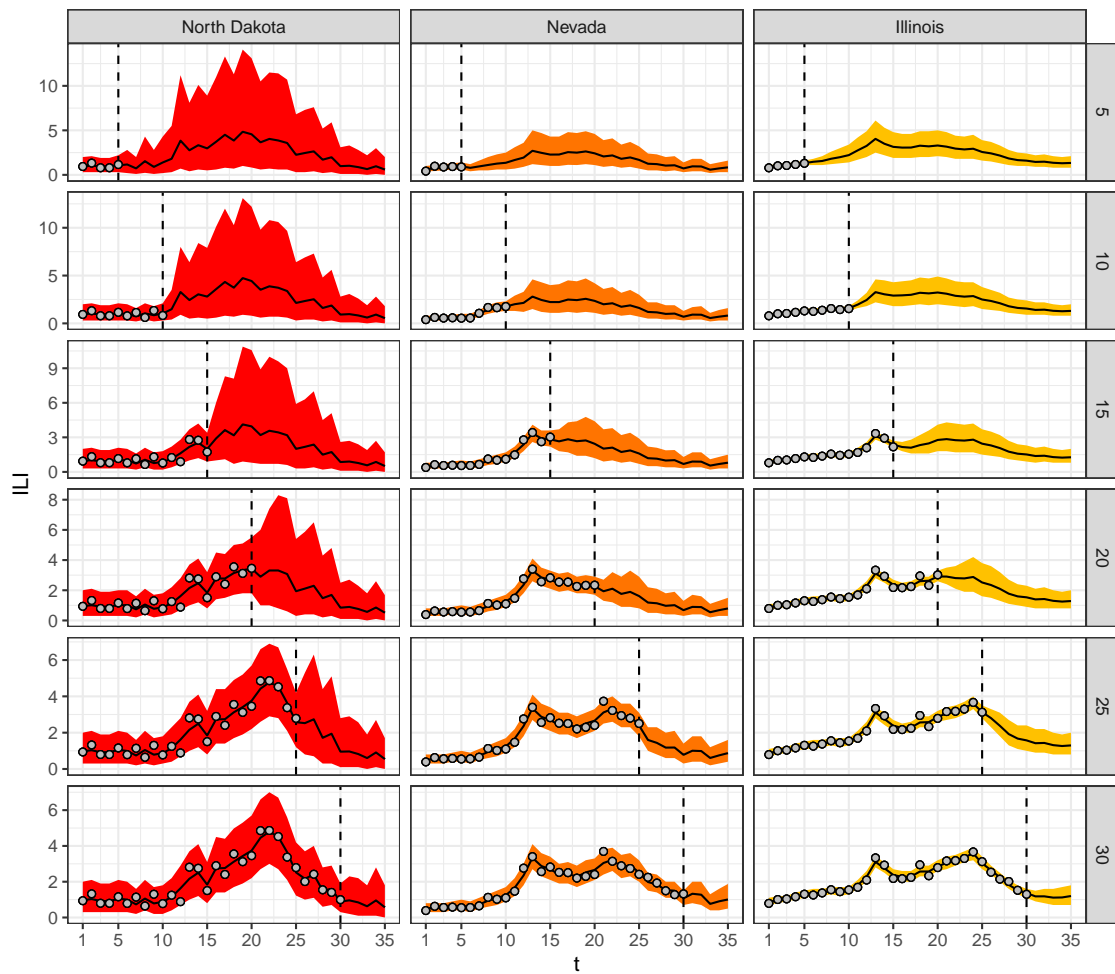

Figure 9: Inferno forecasts for the 2018/19 flu season for North Dakota, Nevada, and Illinois (columns) made  $t = 5, 10, 15, 20, 25, 30$  weeks into the flu season based on summaries of draws from the posterior predictive distribution  $[\tilde{y}|\mathbf{y}_{1:t}]$  of Equation 34 (rows). Posterior mean (black line) and 95% prediction intervals (ribbons) are displayed, along with  $\mathbf{y}_{1:t}$  (grey points).

### 3 Results

Inferno is compared to all models that participated in the U.S. CDC’s 2018/19 National and Regional FluSight challenge as well as the State challenge. Forecasting follows the guidelines outlined by the CDC FluSight challenge; see [22] for details. The forecasts and the evaluation procedure is briefly described below.

Forecasts are made for four short-term targets (1, 2, 3, and 4-week-ahead) and three seasonal targets (the peak week, the peak percentage, and the onset week — onset is not forecasted for the State challenge). All forecast targets are binned and a probability is assigned to each bin such that the sum of all probabilities over all bins for a target equals 1. Say bin  $b$  is the bin containing the correct target and  $p_b \in [0, 1]$  is the probability assigned to the correct bin. The log score is then  $\max(-10, \log(p_b))$ . When  $b$  is the bin of the correct target, the evaluation criteria is called the *single-bin log score*; single-bin log score is the scoring criteria used starting with the 2019/20 FluSight challenge and is a proper score. When  $b$  is the set of bins containing the correct target plus/minus a set of predefined neighboring bins, the evaluation criteria is called the *multi-bin log score*; multi-bin log score is the scoring criteria used in the 2018/19 FluSight challenge. The multi-bin log score is an improper scoring rule [21]. Multi-bin skill and single-bin skill are derived by exponentiating the multi-bin and single-bin log scores, respectively.

ILI data is subject to weekly revisions. As a result, it is important to use the ILI estimates that were available at the time to make faithful comparisons to models that participated in the real-time FluSight challenges. Data available at historical dates are made available by the Carnegie Mellon University Delphi group’s API [7] and were used to produce the results in this section.

Figure 10 and Table 1 show the multi- and single-bin skills for Inferno and all models that participated in the 2018/19 FluSight challenges. Inferno would have placed 2nd only to Dante in the 2018/19 FluSight National and Regional as well as State challenges. FluSight 2018/19 used multi-bin skill as the forecast evaluation. Starting with FluSight 2019/20, single-bin skill will be used. While single-bin and multi-bin skills are correlated, as can be seen in Figure 10, the relationship is not perfect. Models can rise or fall in the relative ranking depending on which evaluation metric is used for scoring, highlighting that the evaluation metric the forecasting challenge organizing body selects is of consequence. Inferno and Dante both perform better under the multi-bin skill evaluation than single-bin skill, but are both top 4 models by either evaluation metric. Most importantly, the drop in predictive performance from Dante to Inferno is small.

The small drop in predictive performance from Dante to Inferno is offset by Inferno’s significant improvement in runtime and preparation for future scalability to more granular forecasting geographies. Figure 11 shows the runtime comparison between Dante and Inferno at different stages of the flu season. Dante takes between 90 and 105 minutes to produce 25,000 MCMC samples throughout the 2018/19 flu season. Inferno takes between 30 seconds

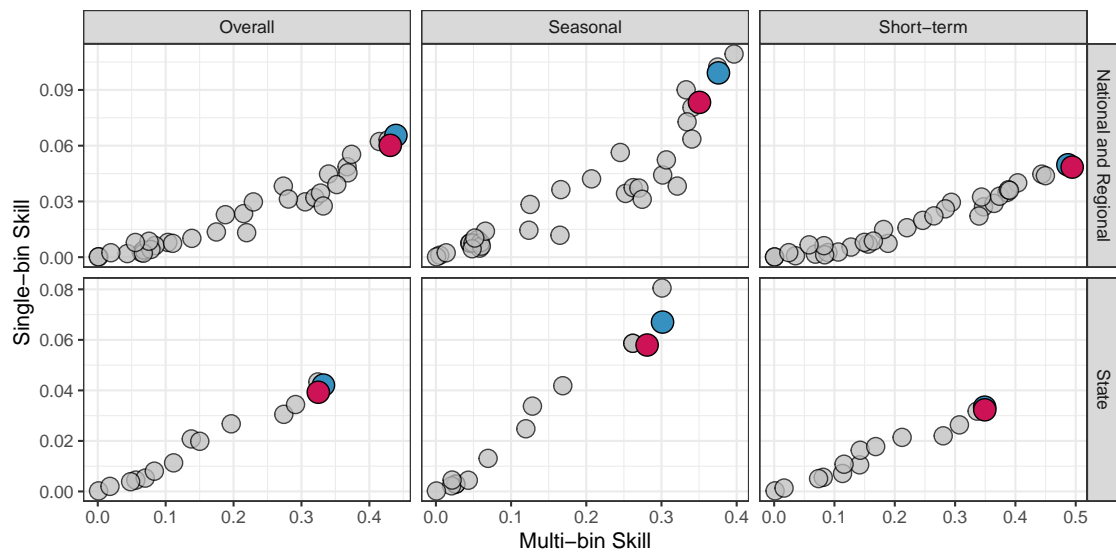

Figure 10: Results for the 2018/19 FluSight National and Regional challenge (top row) and State challenge (bottom row) for Inferno (red point), Dante (blue point) and all other models that participated in the 2018/19 FluSight challenges (grey points). The 2018/19 FluSight challenge evaluated models using multi-bin skill (x-axis), but starting with the FluSight 2019/20 challenge, will be using single-bin skill (y-axis). Skill scores are presented overall (left column), but also by seasonal targets (middle column) and short-term targets (right column). Inferno is a leading forecasting model overall, excelling in short-term forecasting, with good but not leading seasonal forecasting performance.

266 and 2 minutes to produce the same number of MCMC samples. The runtimes in Figure 11 are  
 267 not directly comparable, as Inferno's runtimes are for only one of the 64 geographies (53 states,  
 268 10 HHS regions, and the United States), while Dante's runtimes are for all 64 geographies. If  
 269 Inferno ran sequentially over all geographies, it would take roughly 30 minutes at the beginning  
 270 of the season and 130 minutes at the end of the season, resulting in no computational gains over  
 271 Dante by the end of the flu season. However, Inferno is trivially parallelizable. With cluster  
 272 computing, all 64 geographies of Inferno could be computed simultaneously in two minutes  
 273 or less. The significant advantage Inferno has over Dante is its scalability via parallelization.  
 274 Thus, while Inferno's predictive performance is comparable to but slightly worse than Dante's,  
 275 its significantly improved runtime and scalability make it a more attractive alternative for both  
 276 the present and the future.

Table 1: The rank by challenge and target for Inferno and Dante as measured by single-bin and multi-bin skill. Inferno would have placed 2nd in both the National and Regional and the State challenges as measured by multi-bin skill, only finishing behind Dante. Inferno would have placed 4th (National and Regional) and 3rd (State) were the forecasts evaluated with single-bin skill. For both challenges and both evaluation metrics, Inferno achieved better short-term than seasonal performance.

| 2018/19 FluSight<br>Challenge | Target                 | Multi-bin Rank |       | Single-bin Rank |       |
|-------------------------------|------------------------|----------------|-------|-----------------|-------|
|                               |                        | Inferno        | Dante | Inferno         | Dante |
| National and Regional         | Overall                | 2              | 1     | 4               | 1     |
|                               | 1 wk ahead             | 1              | 2     | 1               | 2     |
|                               | 2 wk ahead             | 1              | 2     | 2               | 1     |
|                               | 3 wk ahead             | 1              | 2     | 2               | 1     |
|                               | 4 wk ahead             | 2              | 1     | 2               | 1     |
|                               | Season peak percentage | 5              | 1     | 5               | 3     |
|                               | Season peak week       | 11             | 8     | 11              | 8     |
| State                         | Overall                | 2              | 1     | 3               | 2     |
|                               | 1 wk ahead             | 3              | 1     | 3               | 1     |
|                               | 2 wk ahead             | 2              | 1     | 2               | 1     |
|                               | 3 wk ahead             | 1              | 2     | 2               | 1     |
|                               | 4 wk ahead             | 1              | 2     | 1               | 2     |
|                               | Season peak percentage | 3              | 2     | 5               | 2     |
|                               | Season peak week       | 3              | 1     | 3               | 1     |

## 4 Discussion

277

278 In this paper, I argued that while predictive performance is the most important measure  
279 of a forecasting model, it is not singularly important. Other factors like interpretability,  
280 generalizability, scalability, and runtime are also important. Developing a model with leading  
281 predictive performance but drastically improved runtime was the motivation behind Inferno.  
282 I laid out a six step procedure to estimate the parameters of Inferno from historical ILI data,  
283 greatly reducing the MCMC computations as executed by the probabilistic programming  
284 language JAGS. Furthermore, by forecasting each geography separately, Inferno can take  
285 advantage of parallelization, both improving forecast runtimes in the present while being  
286 scalable and well-positioned for the more spatially granular future of flu forecasting (e.g.,  
287 county-level forecasting).



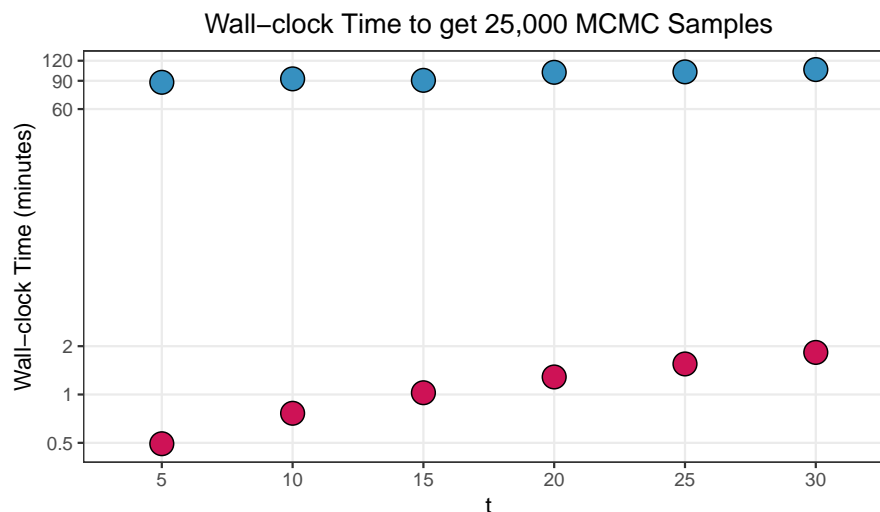

Figure 11: The average wall-clock runtime for a geography (e.g., a state) of Inferno (red) and actual wall-clock runtime for Dante (blue) to get 25,000 MCMC samples. Runtime increases as the size of the conditioning data increases for both Dante and Inferno. Inferno runs in 30 seconds early in the season ( $t=5$ ) and takes approximately 2 minutes by the end of the flu season ( $t=30$ ). In contrast, Dante takes approximately 90 minutes to run at the beginning of the flu season and 105 minutes by the end as a result of it conditioning on a much larger set of data.

288 Inferno’s predictive performance was comparable to but worse than Dante’s. This may be  
289 for a couple different reasons, both of which are addressable. Firstly, Dante explicitly models  
290 backfill; previous work has shown that accounting for and modeling backfill can result in  
291 improved predictive performance [4, 11]. Similar modeling can be incorporated into Inferno at  
292 little additional computational cost. Secondly, Dante achieves self-consistency in its forecasts  
293 by modeling and forecasting all nested geographical units jointly. This self-consistency comes  
294 at a computational cost. The price Inferno pays to achieve significant computational speed-  
295 ups is the loss of self-consistency. There has been some recent work that takes independently  
296 generated probabilistic forecasts and, using principles of coherence, produces self-consistent  
297 forecasts that have improved predictive performance [8]. The combination of backfill modeling  
298 and coherence exploitation may result in equal or even better predictive performance at  
299 minimal computational cost.

300 Inferno’s development was motivated by the desire to build a forecasting model that main-  
301 tains world-leading predictive performance while improving forecasting model properties not  
302 directly evaluated by FluSight. It is relatively straightforward to list characteristics we desire  
303 in an infectious disease forecasting model that extend well beyond predictive performance.  
304 For instance, we want forecasting models to

- 305 • reliably and accurately forecast public health relevant targets with actionable lead times
- 306 • quantify their forecast uncertainties

- 307           • incorporate public health interventions, facilitating “what-if” scenario assessments
- 308           • be transferrable between disease contexts and geographies
- 309           • run at all spatial scales
- 310           • be nimble and adaptable to ever-changing forecast settings
- 311           • run quickly, facilitating fast development and testing.

312 No forecasting model in existence today does all of these things well, but developing such a  
313 model should be the goal.

314         Forecasting challenges have proven to be highly effective organizing tools to help focus  
315 forecasters around a common goal, providing real value to public health responses. The sin-  
316 gular goal of forecasters to maximize their predictive score is both a blessing and a curse.  
317 The predictive score helps generate competition which drives innovation and improvement.  
318 It also puts up blinders to all other characteristics we want forecasting models to have. A big  
319 question the forecasting community must address going forward is how forecasting challenges  
320 can be modified to expand their definition of what a “good” forecasting model is. That is,  
321 should forecasting challenges explicitly incorporate aspects of forecasting model generalizabil-  
322 ity, interpretability, utility, scalability, and speed and if so, how? Or are forecasting challenges  
323 not meant to assess forecasting models holistically but rather only assess one specific aspect  
324 of those models — their predictive performance?

## 325 **Acknowledgements**

326 The author is thankful to C.C. Essix for her support and encouragement. This work was  
327 developed with the support of LANL’s LDRD research Project 20190546ECR. The author is  
328 thankful to the U.S. CDC FluSight team for making historical forecast submissions publicly  
329 available. Approved for unlimited release under LA-UR-20-30384.

## 330 Appendix A

331 The following inputs are supplied to the JAGS model that implements Inferno:

- 332 • **T** is 35, the number of weeks of the flu season.
- 333 • **y** is a  $35 \times 1$  vector where  $y[t]$  is the observed (w)ILI value for week  $t$  if it has been  
334 observed or NA if it has not. If  $y[t]$  is less than 0.0005 or greater than 0.9995,  $y[t]$  is  
335 set equal to 0.0005 or 0.9995, respectively.
- 336 • **alpha** is  $\hat{\alpha}$ , computed from Equation 14.
- 337 • **gamma** is a  $35 \times 1$  vector where  $\text{gamma}[t]$  is  $\hat{\gamma}_t$ , computed from Equation 19.
- 338 • **invCholUpper** is the inverse of the upper triangular Cholesky decomposition of  $\hat{\Sigma}^{-1}$ ,  
339 where  $\hat{\Sigma}$  is computed from Equation 32 and 33.
- 340 • **sigma\_mu** is the square root of  $\hat{\sigma}_\mu^2$ , computed from Equation 24.

341 The JAGS code implementing Inferno is as follows:

```
342 model{
343   for(t in 1:T){
344     ## draw from posterior predictive distribution
345     ypred[t] ~ dbeta(alpha*theta[t], alpha*(1-theta[t]))
346     ## data model
347     y[t] ~ dbeta(alpha*theta[t], alpha*(1-theta[t]))
348     ## compute theta
349     theta[t] <- ilogit(gamma[t] + delta[t])
350   }
351   ## discrepancy GP model
352   delta[1:T] <- mu + invCholUpper %*% Z[1:T]
353   ## sample standard normals
354   for(t in 1:T){
355     Z[t] ~ dnorm(0,1)
356   }
357   ## discrepancy mean model
358   mu ~ dnorm(0,pow(sigma_mu,-2))
359 }
```

## References

360

361

362

363

364

365

366

367

368

369

370

371

372

373

374

375

376

377

378

379

380

381

382

383

384

385

386

387

388

389

390

391

392

393

394

395

396

397

- [1] M. Ben-Nun, P. Riley, J. Turtle, D. P. Bacon, and S. Riley. Forecasting National and Regional Influenza-like Illness for the USA. *PLoS Computational Biology*, 15(5):e1007013, 2019.
- [2] J. Bracher. On the multibin logarithmic score used in the FluSight competitions. *Proceedings of the National Academy of Sciences*, 116(42):20809–20810, 2019.
- [3] L. C. Brooks, D. C. Farrow, S. Hyun, R. J. Tibshirani, and R. Rosenfeld. Flexible Modeling of Epidemics with an Empirical Bayes Framework. *PLoS Computational Biology*, 11(8):e1004382, 2015.
- [4] L. C. Brooks, D. C. Farrow, S. Hyun, R. J. Tibshirani, and R. Rosenfeld. Nonmechanistic Forecasts of Seasonal Influenza with Iterative One-week-ahead Distributions. *PLoS Computational Biology*, 14(6):e1006134, 2018.
- [5] S. Y. Del Valle, B. H. McMahon, J. Asher, R. Hatchett, J. C. Lega, H. E. Brown, M. E. Leany, Y. Pantazis, D. J. Roberts, S. Moore, et al. Summary Results of the 2014-2015 DARPA Chikungunya Challenge. *BMC Infectious Diseases*, 18(1):245, 2018.
- [6] E. Dong, H. Du, and L. Gardner. An interactive web-based dashboard to track COVID-19 in real time. *The Lancet Infectious Diseases*, 20(5):533–534, 2020.
- [7] D. C. Farrow, L. C. Brooks, A. Rumack, R. J. Tibshirani, and R. Rosenfeld. Delphi Epidata API, 2015. Available at <https://github.com/cmu-delphi/delphi-epidata>.
- [8] G. Gibson, K. Moran, N. Reich, and D. Osthus. Improving Probabilistic Infectious Disease Forecasting Through Coherence. *bioRxiv*, 2019.
- [9] M. A. Johansson, K. M. Apfeldorf, S. Dobson, J. Devita, A. L. Buczak, B. Baugher, L. J. Moniz, T. Bagley, S. M. Babin, E. Guven, T. K. Yamana, J. Shaman, T. Moschou, N. Lothian, A. Lane, G. Osborne, G. Jiang, L. C. Brooks, D. C. Farrow, S. Hyun, R. J. Tibshirani, R. Rosenfeld, J. Lessler, N. G. Reich, D. A. T. Cummings, S. A. Lauer, S. M. Moore, H. E. Clapham, R. Lowe, T. C. Bailey, M. García-Díez, M. S. Carvalho, X. Rodó, T. Sardar, R. Paul, E. L. Ray, K. Sakrejda, A. C. Brown, X. Meng, O. Osoba, R. Vardavas, D. Manheim, M. Moore, D. M. Rao, T. C. Porco, S. Ackley, F. Liu, L. Worden, M. Convertino, Y. Liu, A. Reddy, E. Ortiz, J. Rivero, H. Brito, A. Juarrero, L. R. Johnson, R. B. Gramacy, J. M. Cohen, E. A. Mordecai, C. C. Murdock, J. R. Rohr, S. J. Ryan, A. M. Stewart-Ibarra, D. P. Weikel, A. Jutla, R. Khan, M. Poultney, R. R. Colwell, B. Rivera-García, C. M. Barker, J. E. Bell, M. Biggerstaff, D. Swerdlow, L. Mier-y Teran-Romero, B. M. Forshey, J. Trtanj, J. Asher, M. Clay, H. S. Margolis, A. M. Hebbeler, D. George, and J.-P. Chretien. An Open Challenge to Advance Probabilistic Forecasting for Dengue Epidemics. *Proceedings of the National Academy of Sciences*, 116(48):24268–24274, 2019.
- [10] S. Kandula and J. Shaman. Near-term Forecasts of Influenza-like Illness: An Evaluation of Autoregressive Time Series Approaches. *Epidemics*, 27:41–51, 2019.

- 398 [11] D. Osthus, A. R. Daughton, and R. Priedhorsky. Even a Good Influenza Forecasting  
399 Model can Benefit from Internet-based Nowcasts, but those Benefits are Limited. *PLoS*  
400 *Computational Biology*, 15(2):e1006599, 2019.
- 401 [12] D. Osthus, J. Gattiker, R. Priedhorsky, and S. Y. Del Valle. Dynamic Bayesian In-  
402 fluenza Forecasting in the United States with Hierarchical Discrepancy (with Discussion).  
403 *Bayesian Analysis*, 14(1):261–312, 2019.
- 404 [13] D. Osthus, K. S. Hickmann, P. C. Caragea, D. Higdon, and S. Y. Del Valle. Forecasting  
405 Seasonal Influenza with a State-space SIR Model. *The Annals of Applied Statistics*,  
406 11(1):202, 2017.
- 407 [14] D. Osthus and K. R. Moran. Multiscale Influenza Forecasting. *arXiv preprint*  
408 *arXiv:1909.13766*, 2019.
- 409 [15] S. Pei, S. Kandula, W. Yang, and J. Shaman. Forecasting the Spatial Transmission  
410 of Influenza in the United States. *Proceedings of the National Academy of Sciences*,  
411 115(11):2752–2757, 2018.
- 412 [16] M. Plummer. JAGS: A Program for Analysis of Bayesian Graphical Models Using Gibbs  
413 Sampling. In *Proceedings of the 3rd international workshop on distributed statistical*  
414 *computing*, volume 124, page 10. Vienna, Austria., 2003.
- 415 [17] M. Plummer. *rjags: Bayesian Graphical Models using MCMC*, 2018. R package version  
416 4-8.
- 417 [18] R Core Team. *R: A Language and Environment for Statistical Computing*. R Foundation  
418 for Statistical Computing, Vienna, Austria, 2018.
- 419 [19] E. L. Ray and N. G. Reich. Prediction of Infectious Disease Epidemics via Weighted  
420 Density Ensembles. *PLoS Computational Biology*, 14(2):e1005910, 2018.
- 421 [20] N. G. Reich, L. C. Brooks, S. J. Fox, S. Kandula, C. J. McGowan, E. Moore, D. Osthus,  
422 E. L. Ray, A. Tushar, T. K. Yamana, M. Biggerstaff, M. A. Johansson, R. Rosenfeld, and  
423 J. Shaman. A Collaborative Multiyear, Multimodel Assessment of Seasonal Influenza  
424 Forecasting in the United States. *Proceedings of the National Academy of Sciences*,  
425 116(8):3146–3154, 2019.
- 426 [21] N. G. Reich, D. Osthus, E. L. Ray, T. K. Yamana, M. Biggerstaff, M. A. Johansson,  
427 R. Rosenfeld, and J. Shaman. Reply to Bracher: Scoring Probabilistic Forecasts to Max-  
428 imize Public Health Interpretability. *Proceedings of the National Academy of Sciences*,  
429 116(42), 9 2019.
- 430 [22] The Epidemic Prediction Initiative. FluSight 2018–2019 Guidance Documents, Septem-  
431 ber 2018. Available at <https://predict.cdc.gov/post/5ba1504e5619f003acb7e18f>.
- 432 [23] The Epidemic Prediction Initiative. Aedes Forecasting 2019, February 2019. Available  
433 at <https://predict.cdc.gov/post/5c4f6d687620e103b6dcd015>.
- 434 [24] The Epidemic Prediction Initiative. West Nile Virus Forecasting 2020, January 2020.  
435 Available at <https://predict.cdc.gov/post/5e18a08677851c0489cf10b8>.

- 436 [25] The United States Centers for Disease Control and Prevention. Disease Burden of In-  
437 fluenza, December 2020. Available at [https://www.cdc.gov/flu/about/burden/index.](https://www.cdc.gov/flu/about/burden/index.html)  
438 [html](https://www.cdc.gov/flu/about/burden/index.html).
- 439 [26] S. Venkatramanan, B. Lewis, J. Chen, D. Higdon, A. Vullikanti, and M. Marathe. Using  
440 Data-driven Agent-based Models for Forecasting Emerging Infectious Diseases. *Epi-*  
441 *demics*, 22:43–49, 2018.
- 442 [27] N. Wattanachit, S. Wang, N. Reich, E. Ray, J. Niemi, K. Le, A. Khandelwal, A. H. Kanji,  
443 K. House, E. Cramer, M. Cornell, A. Brennen, and J. Bracher. COVID-19 Forecast Hub.  
444 Nov. 2020. Available at <https://github.com/reichlab/covid19-forecast-hub>.
- 445 [28] S. Yang, M. Santillana, and S. C. Kou. Accurate Estimation of Influenza Epidemics  
446 using Google Search Data via ARGO. *Proceedings of the National Academy of Sciences*,  
447 112(47):14473–14478, 2015.

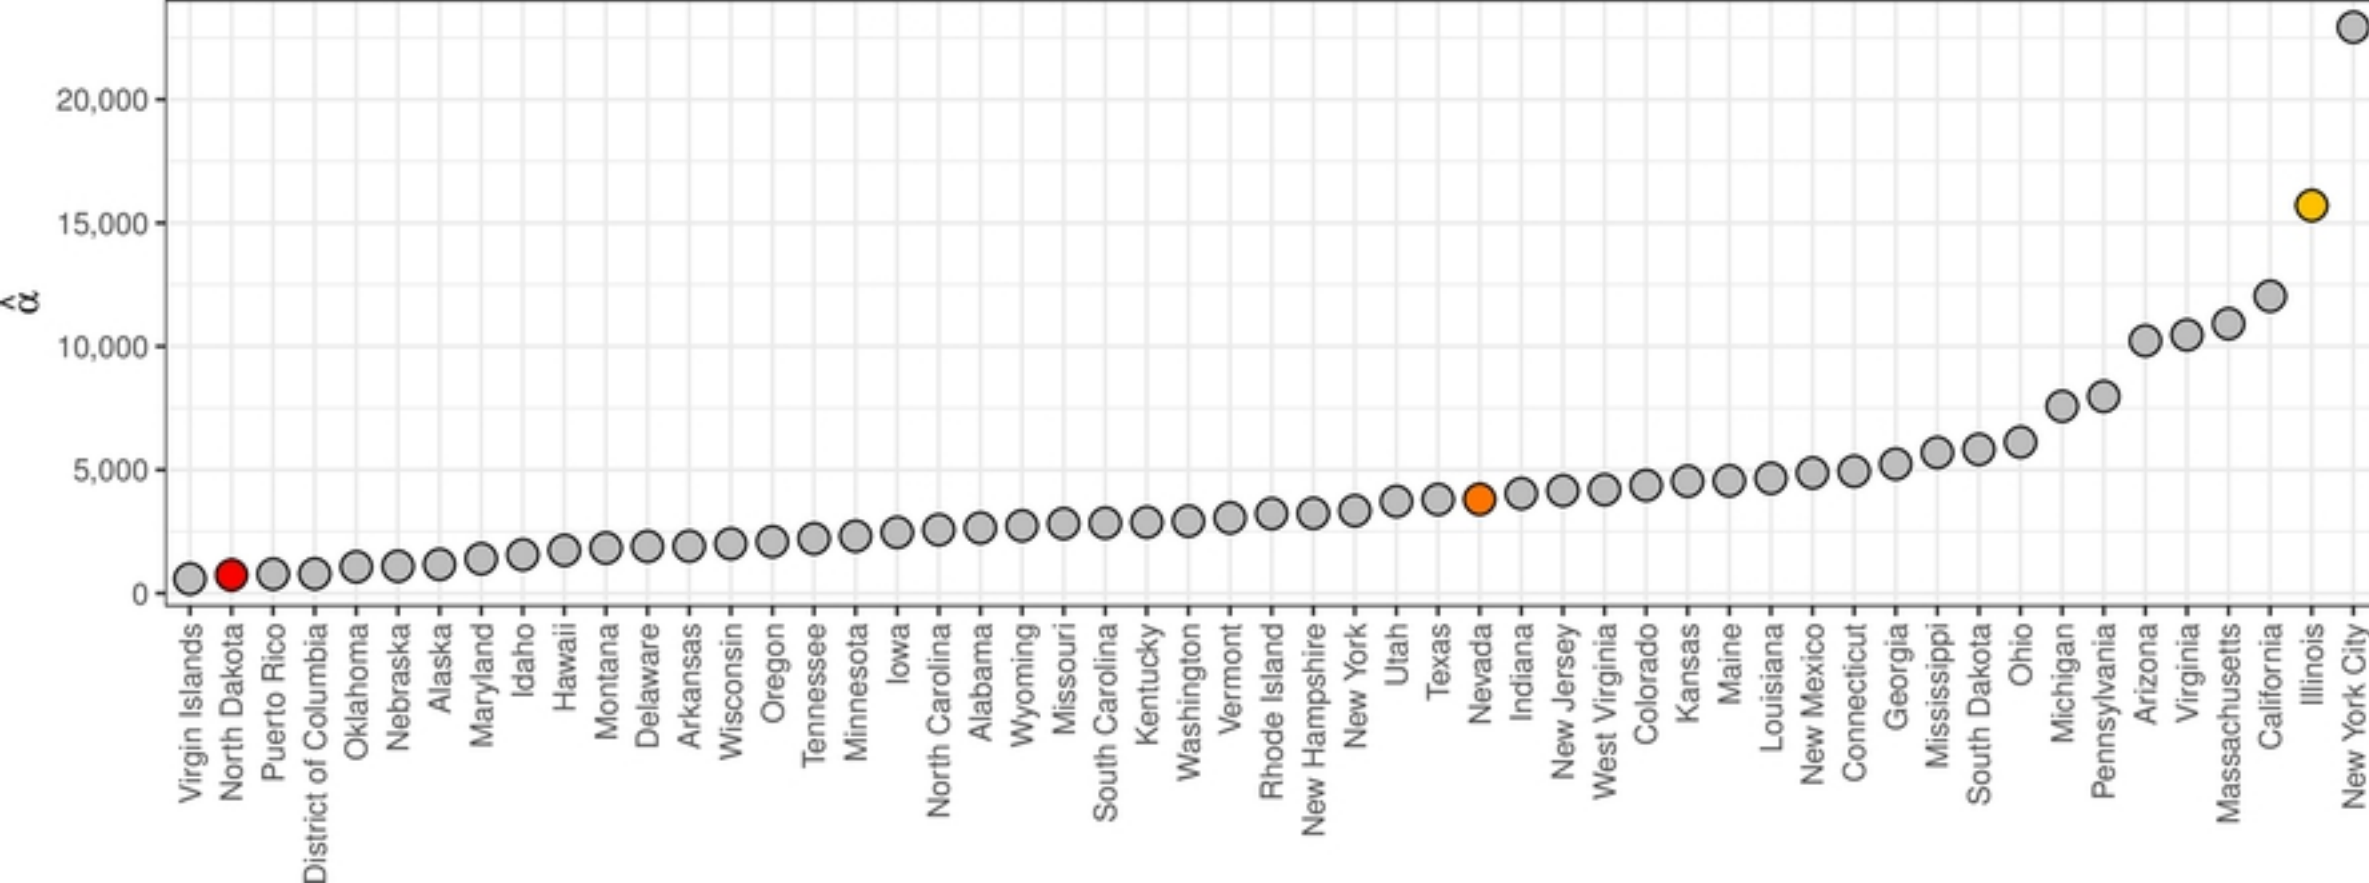

North Dakota 2016/17

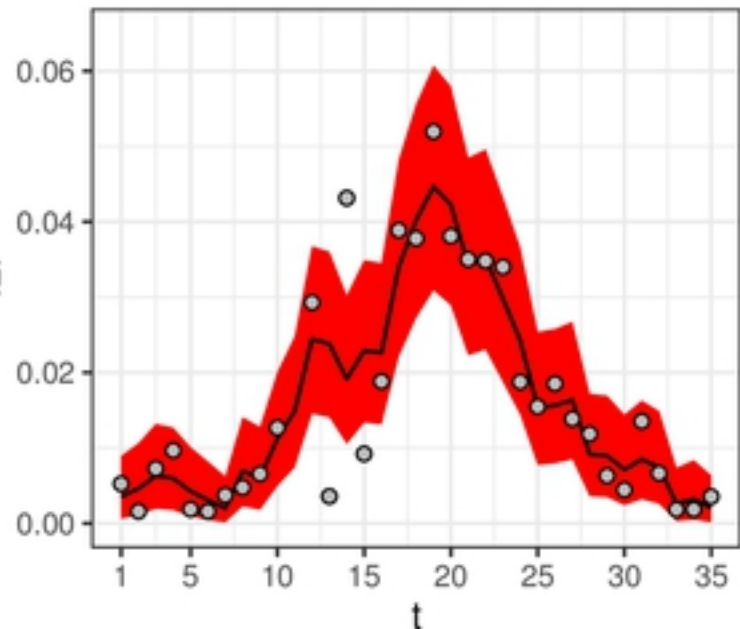

Nevada 2016/17

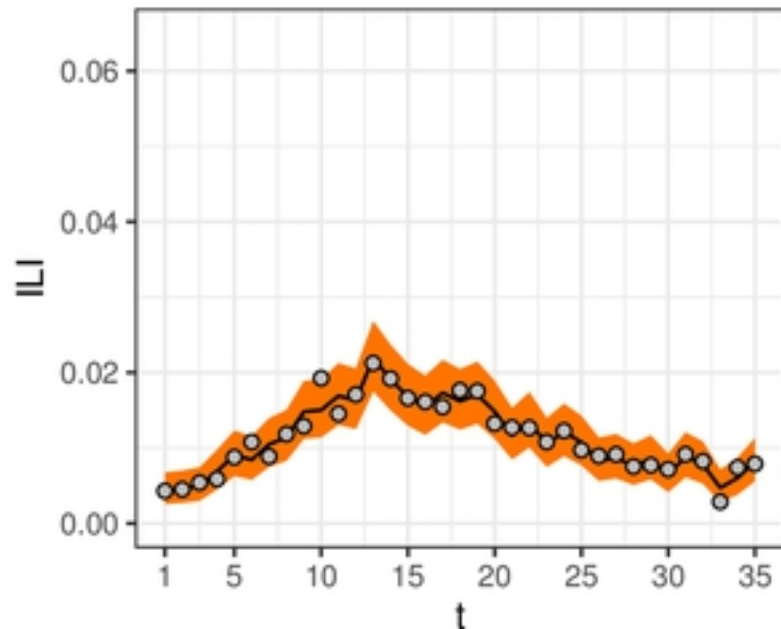

Illinois 2016/17

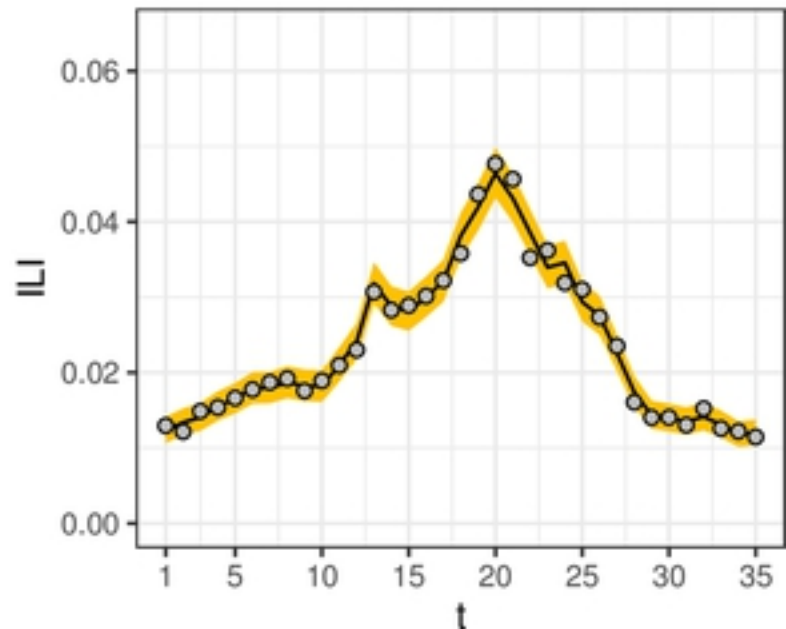



## Illinois

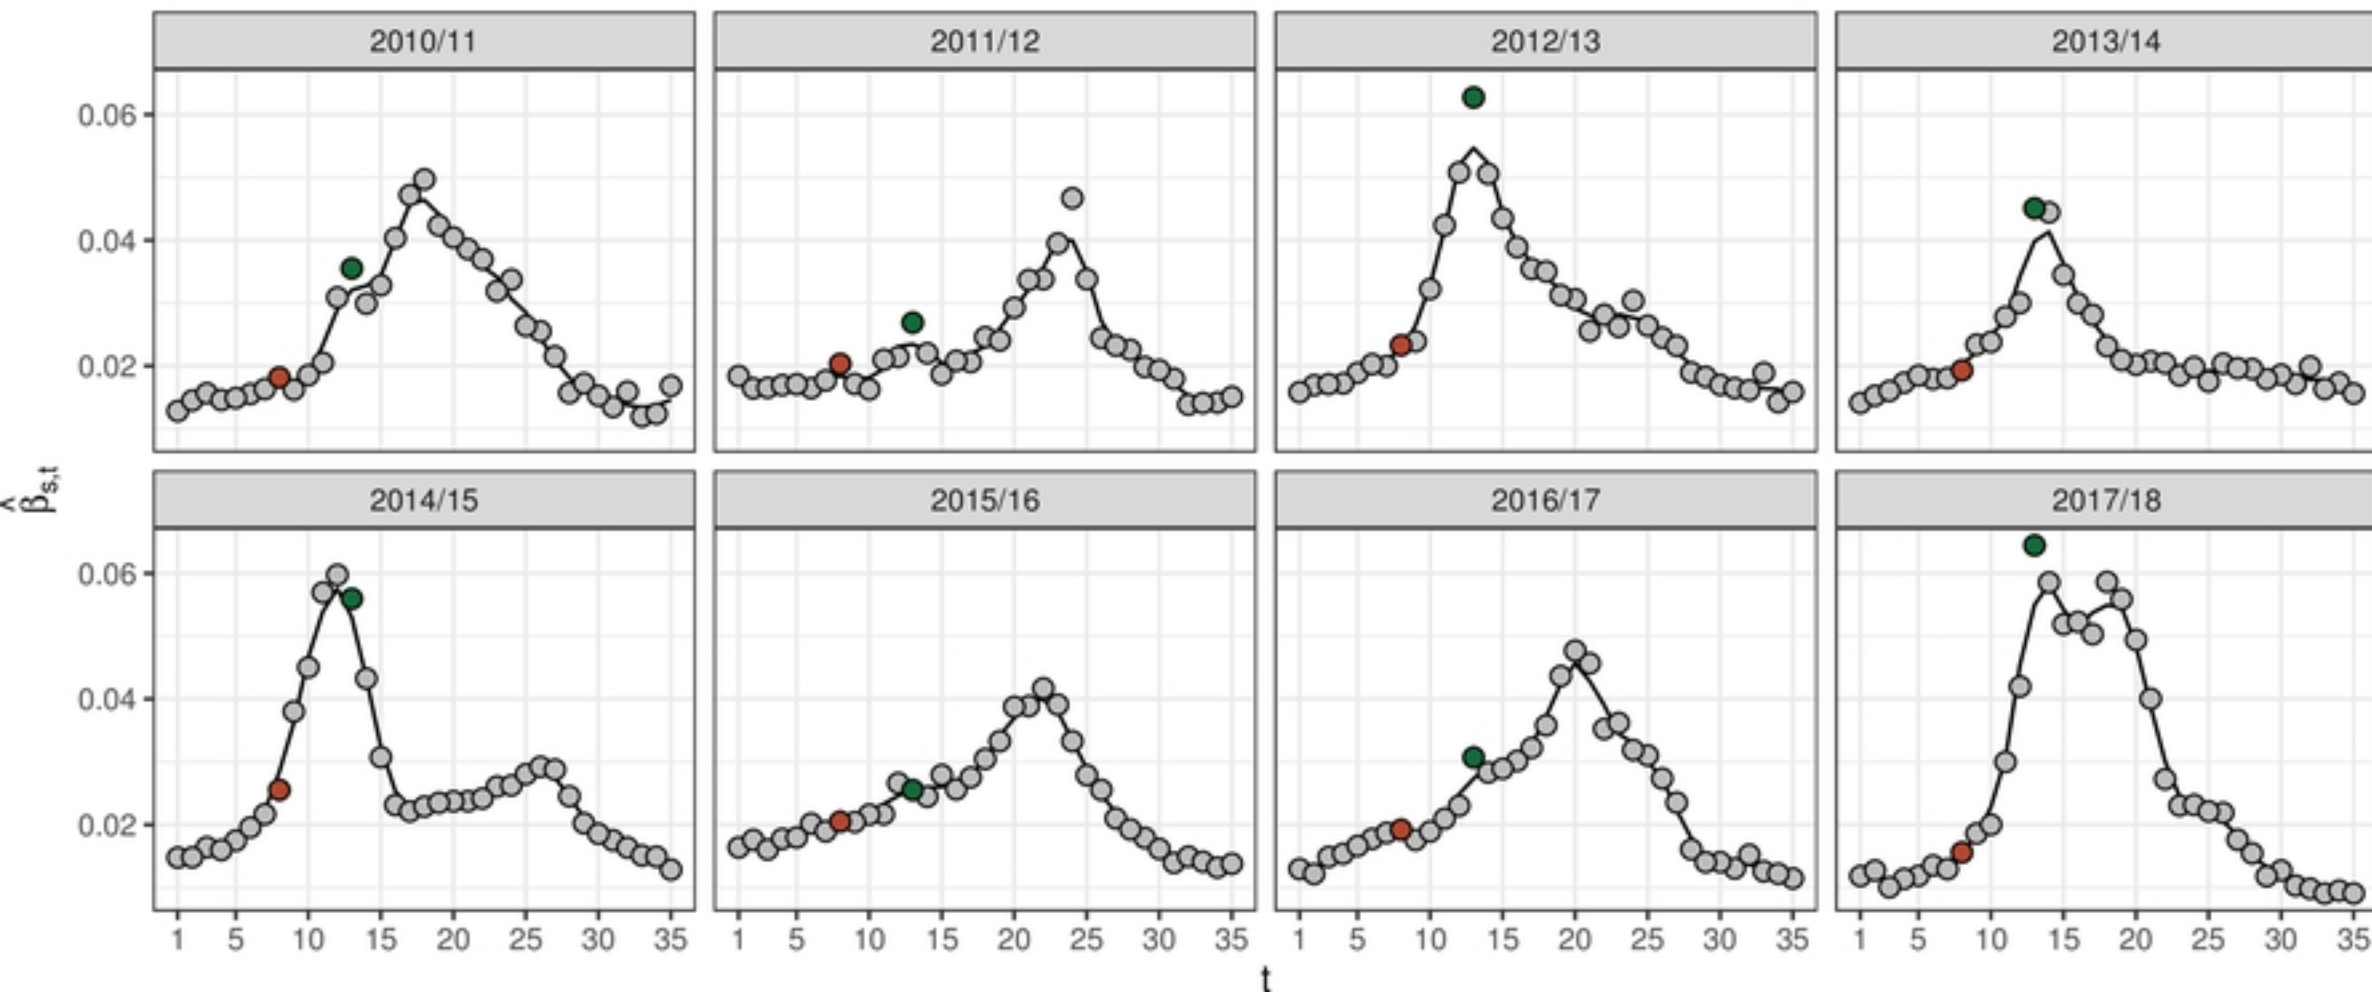

North Dakota

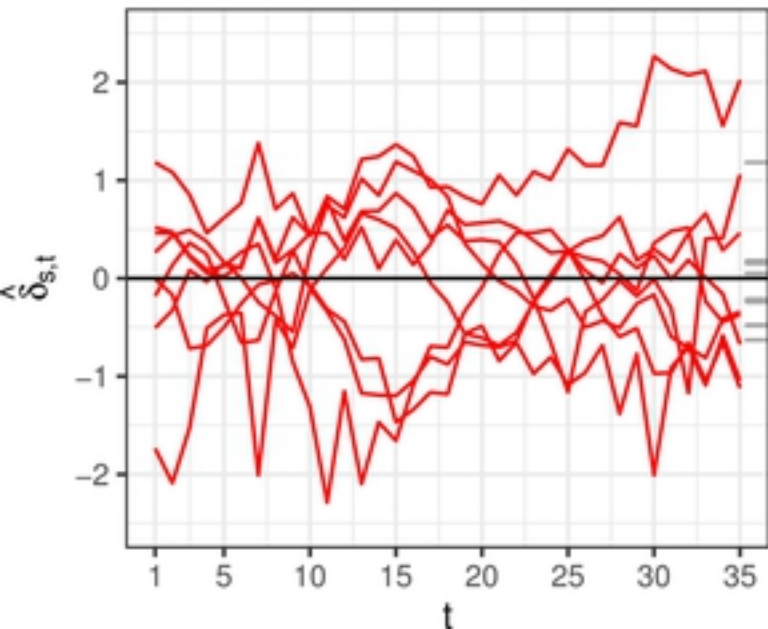

Nevada

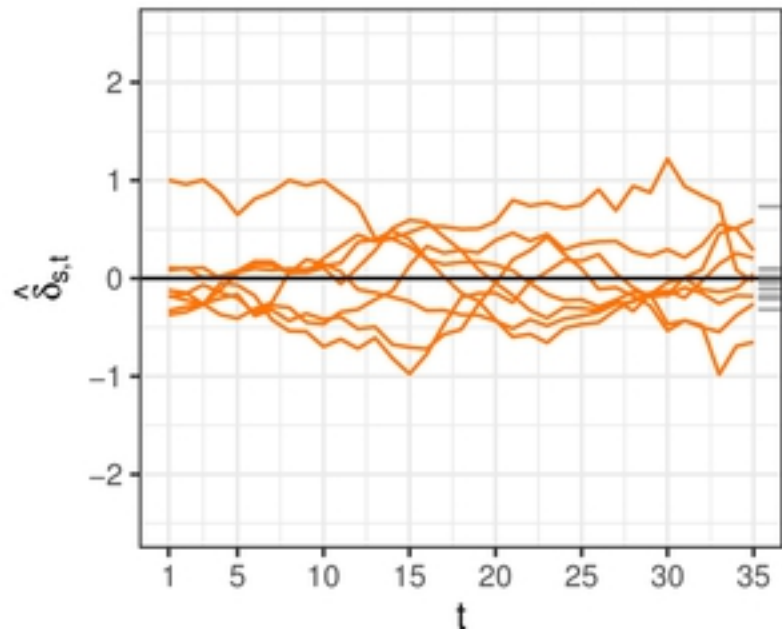

Illinois

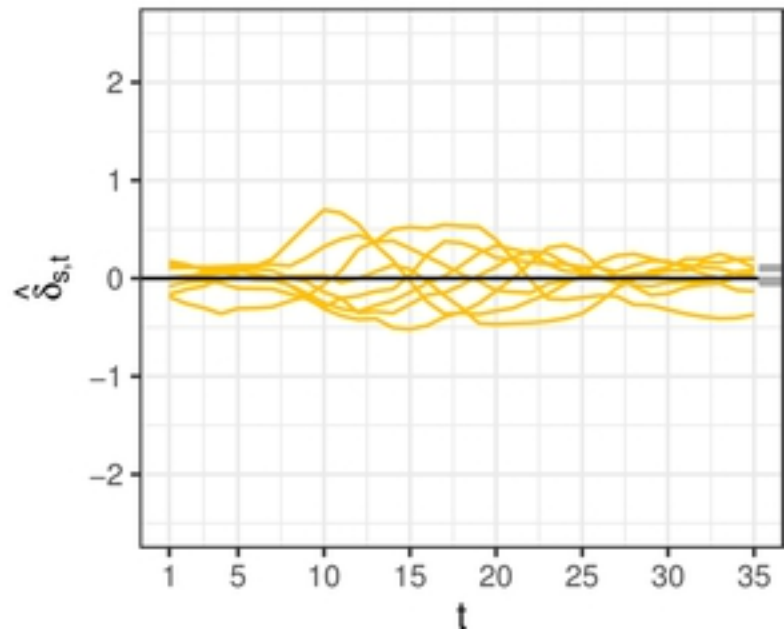

North Dakota

Nevada

Illinois

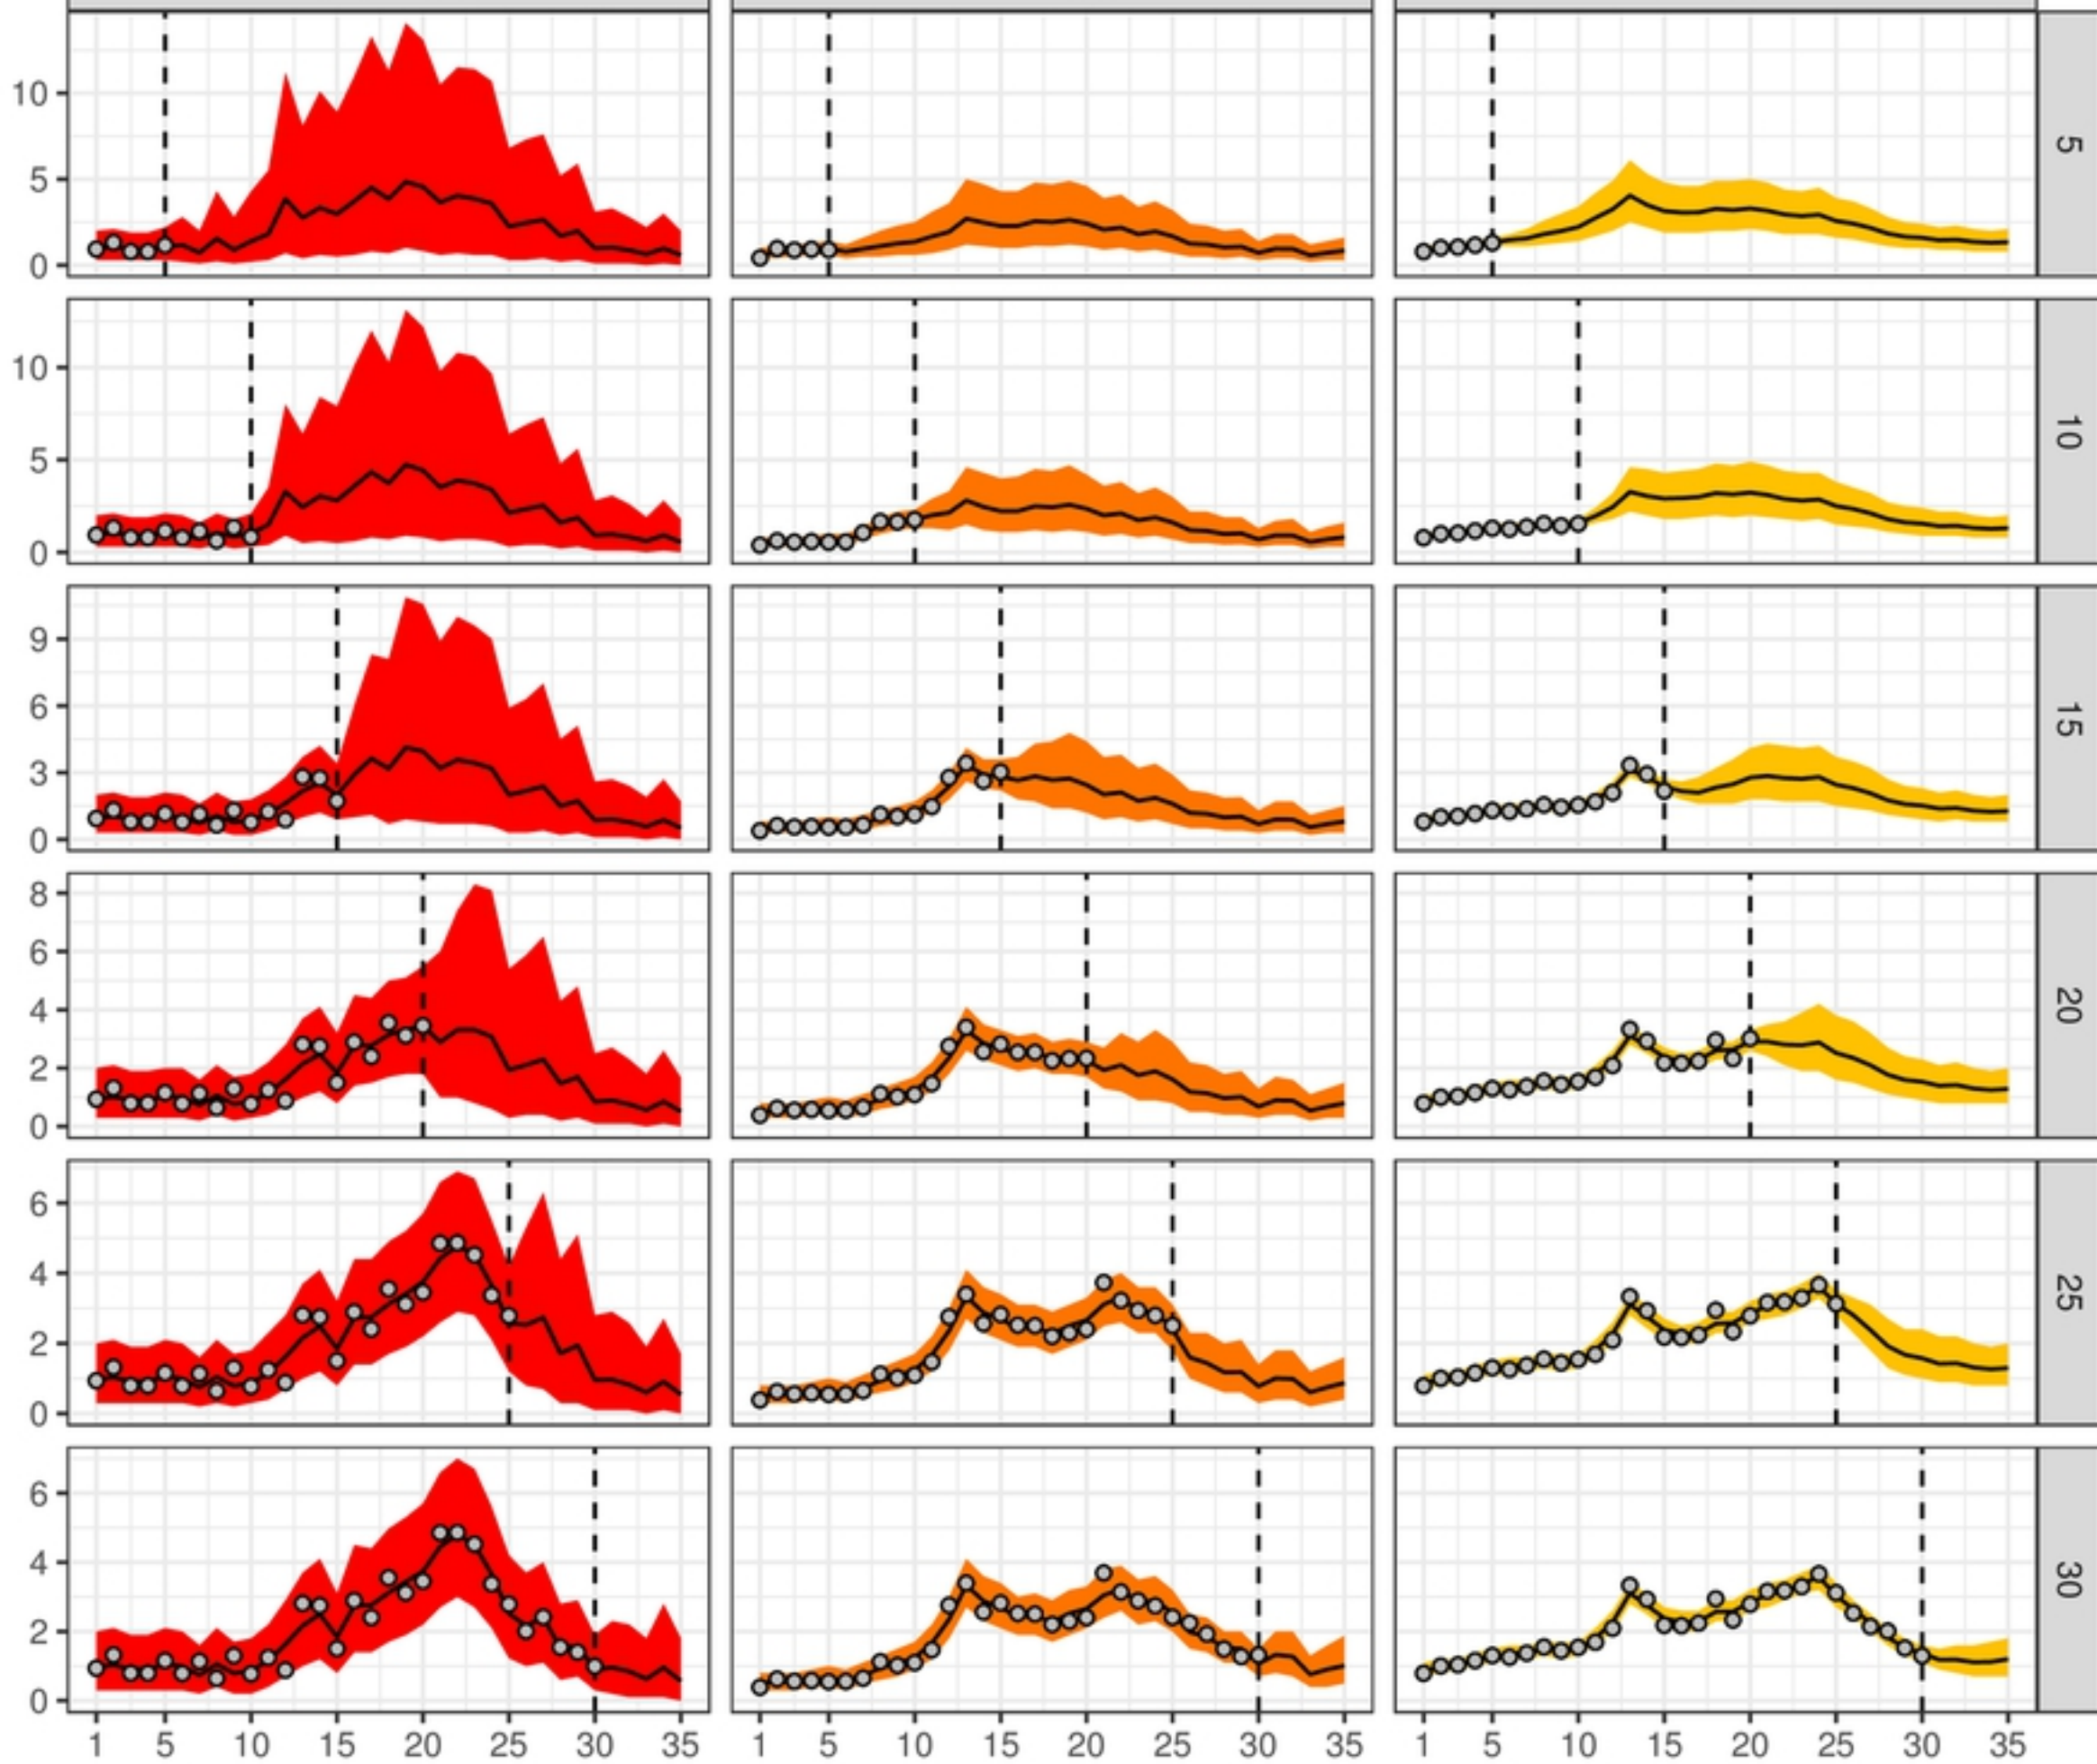

t

North Dakota

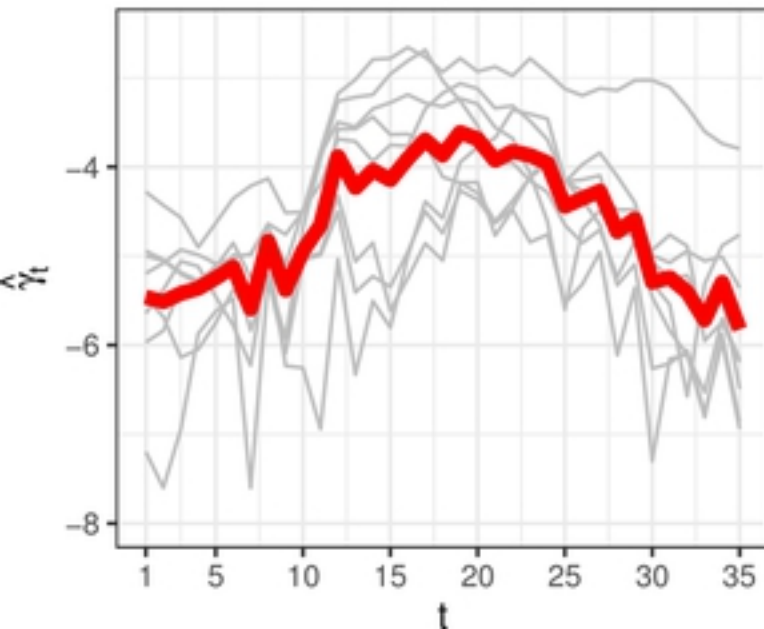

Nevada

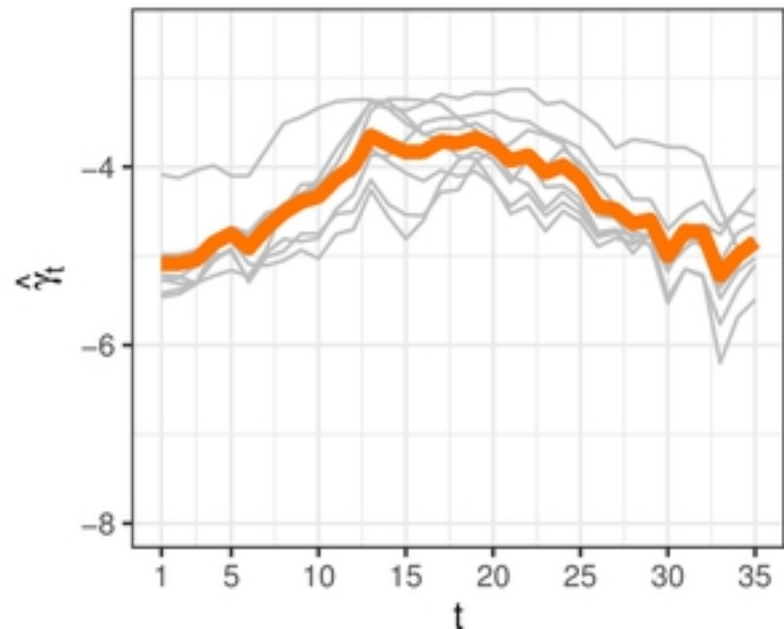

Illinois

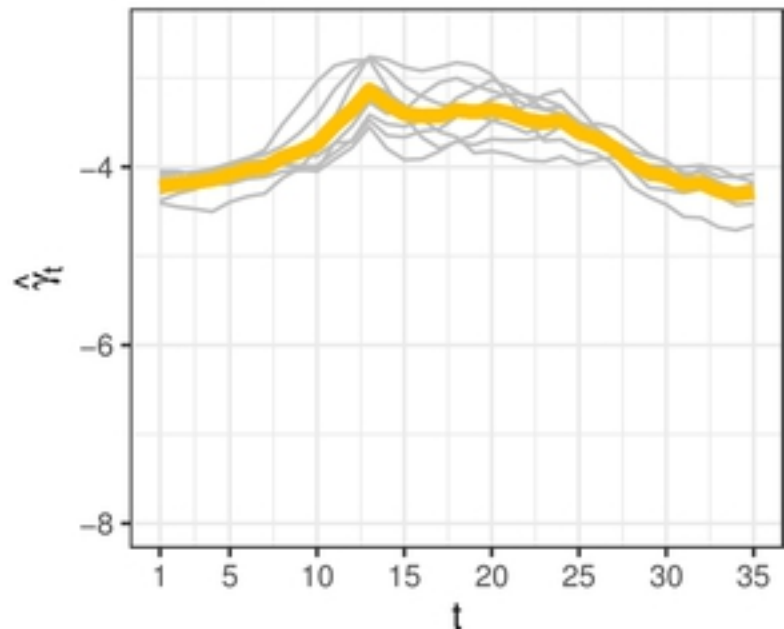

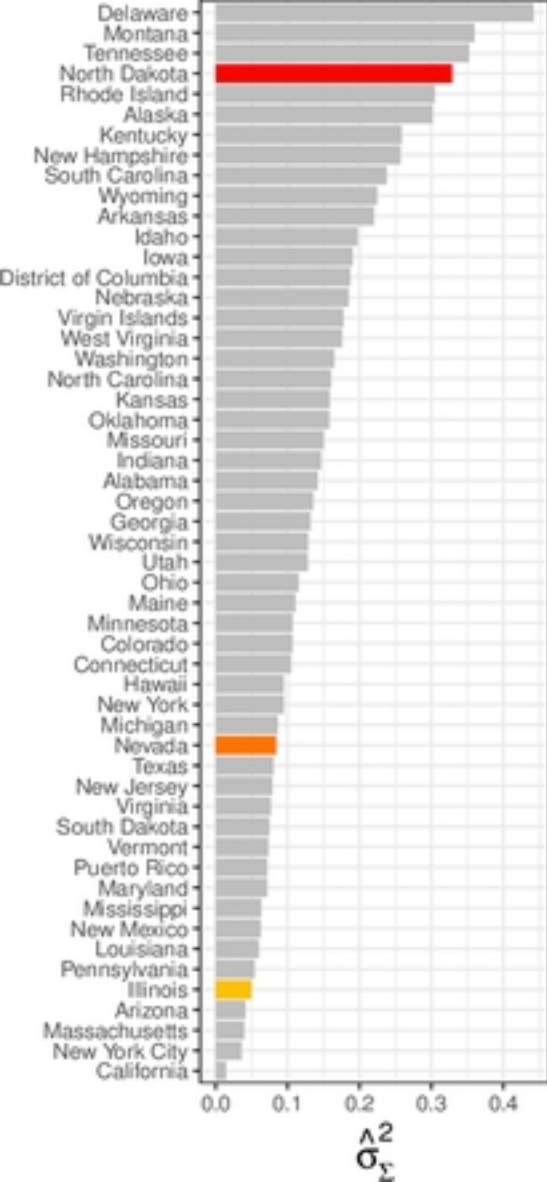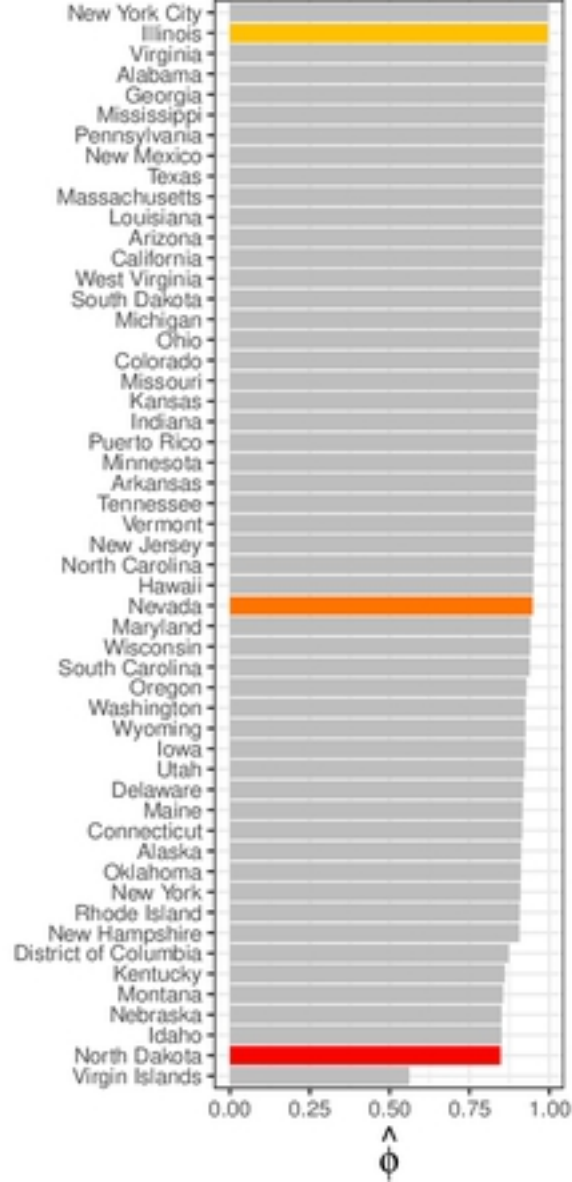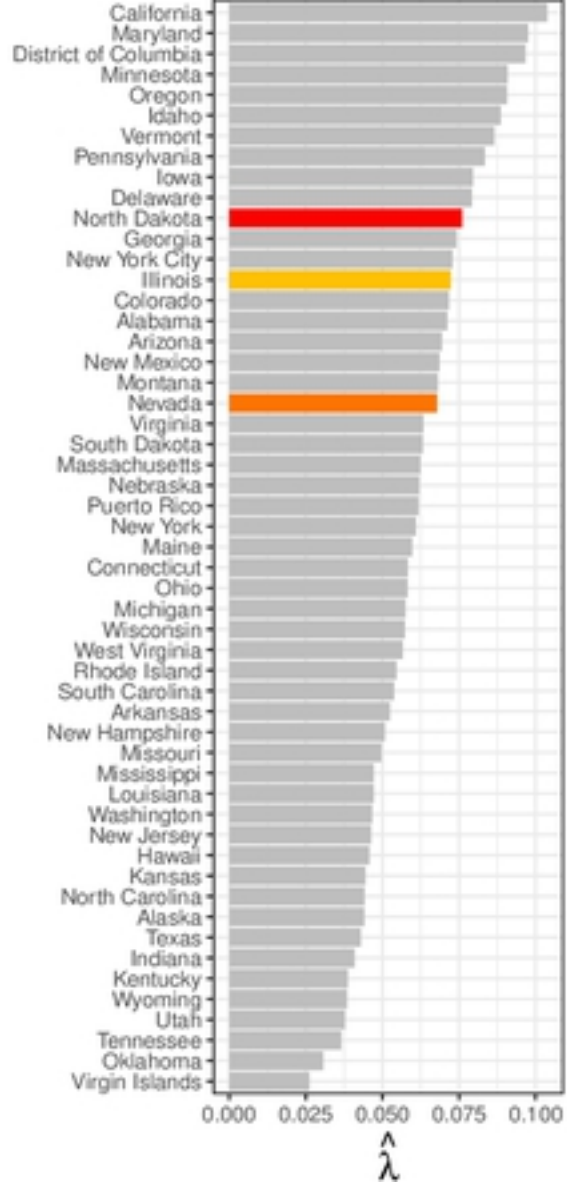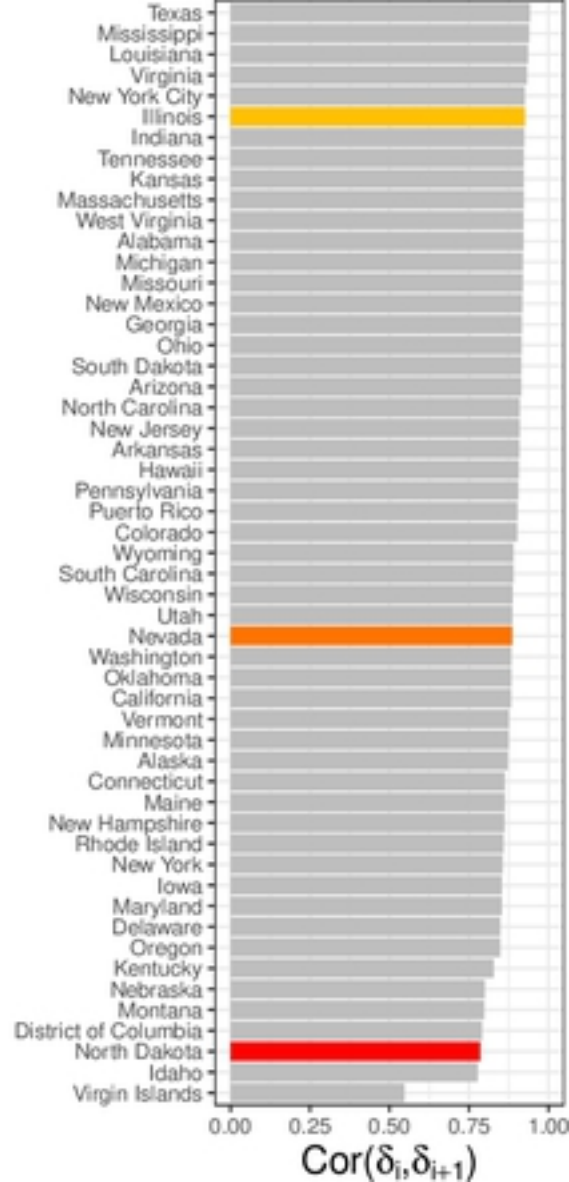

North Dakota

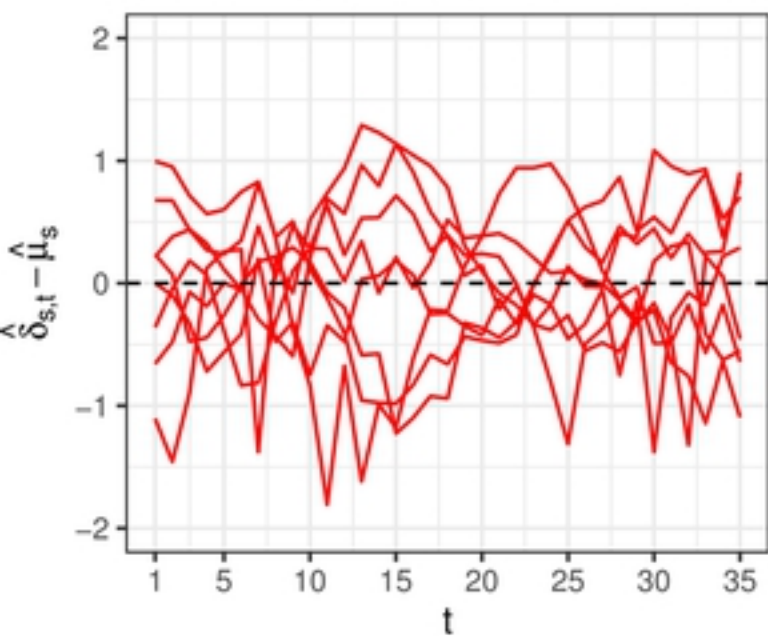

Nevada

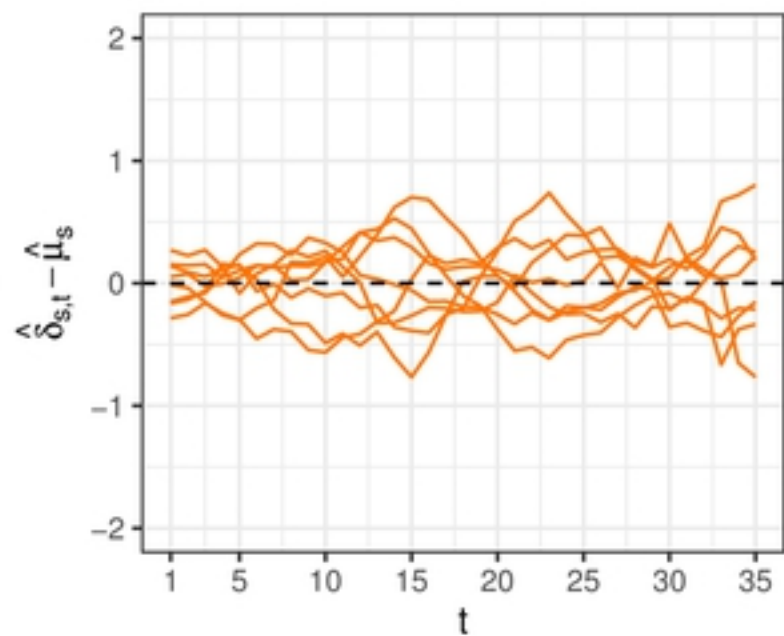

Illinois

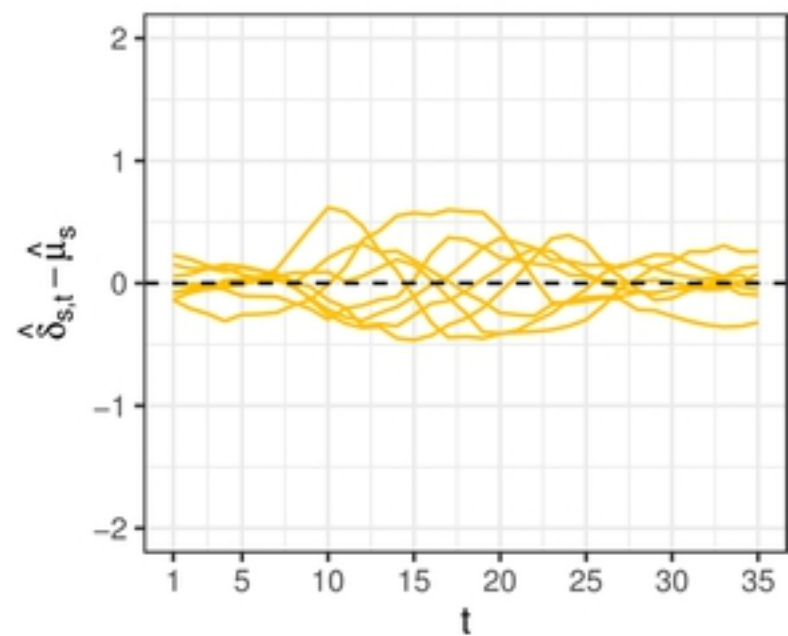

North Dakota

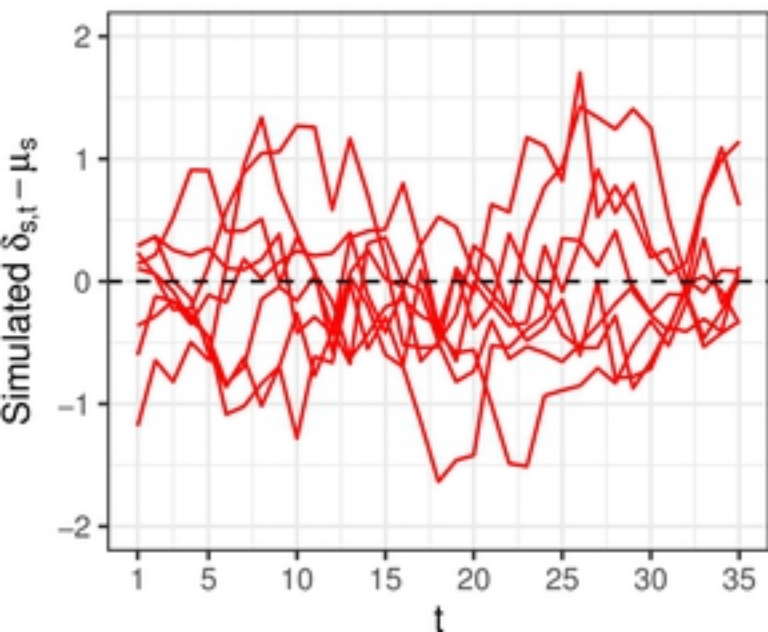

Nevada

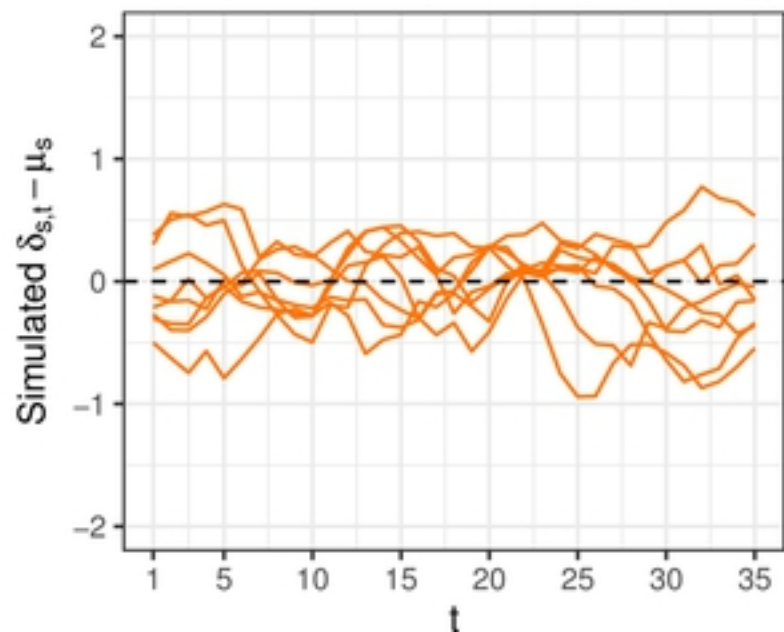

Illinois

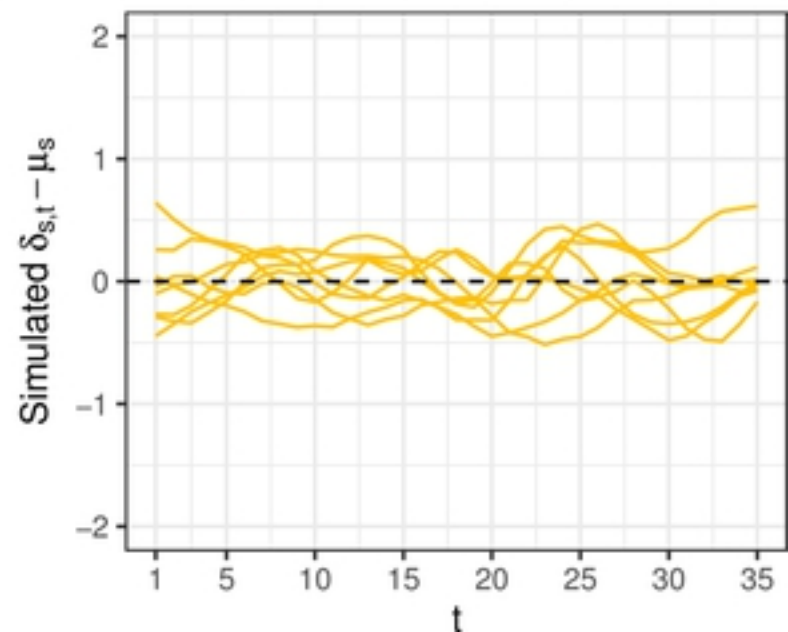

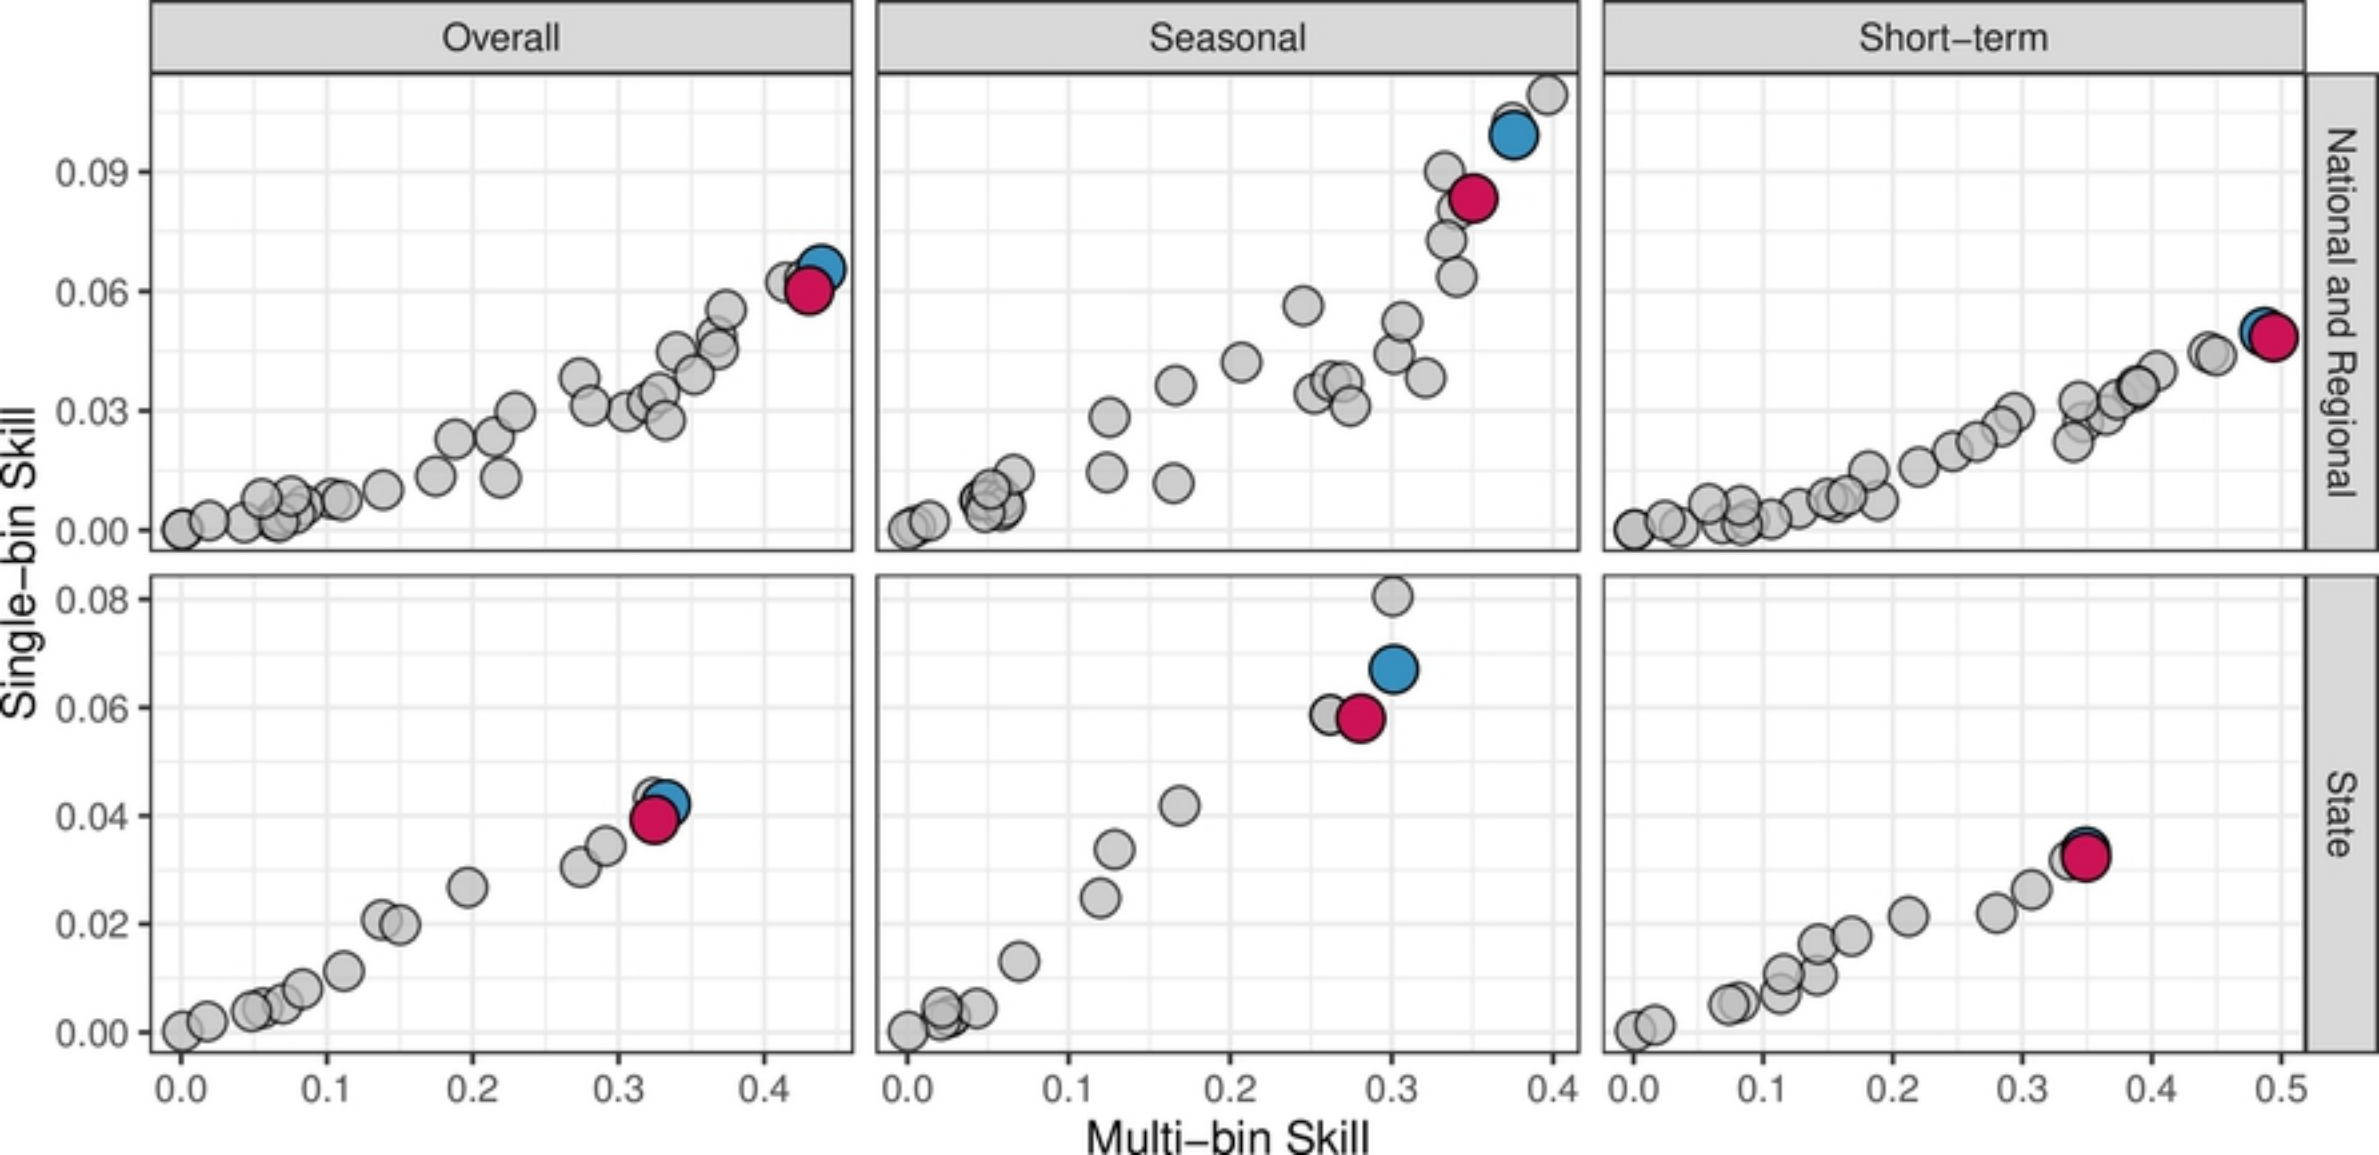

Wall-clock Time to get 25,000 MCMC Samples

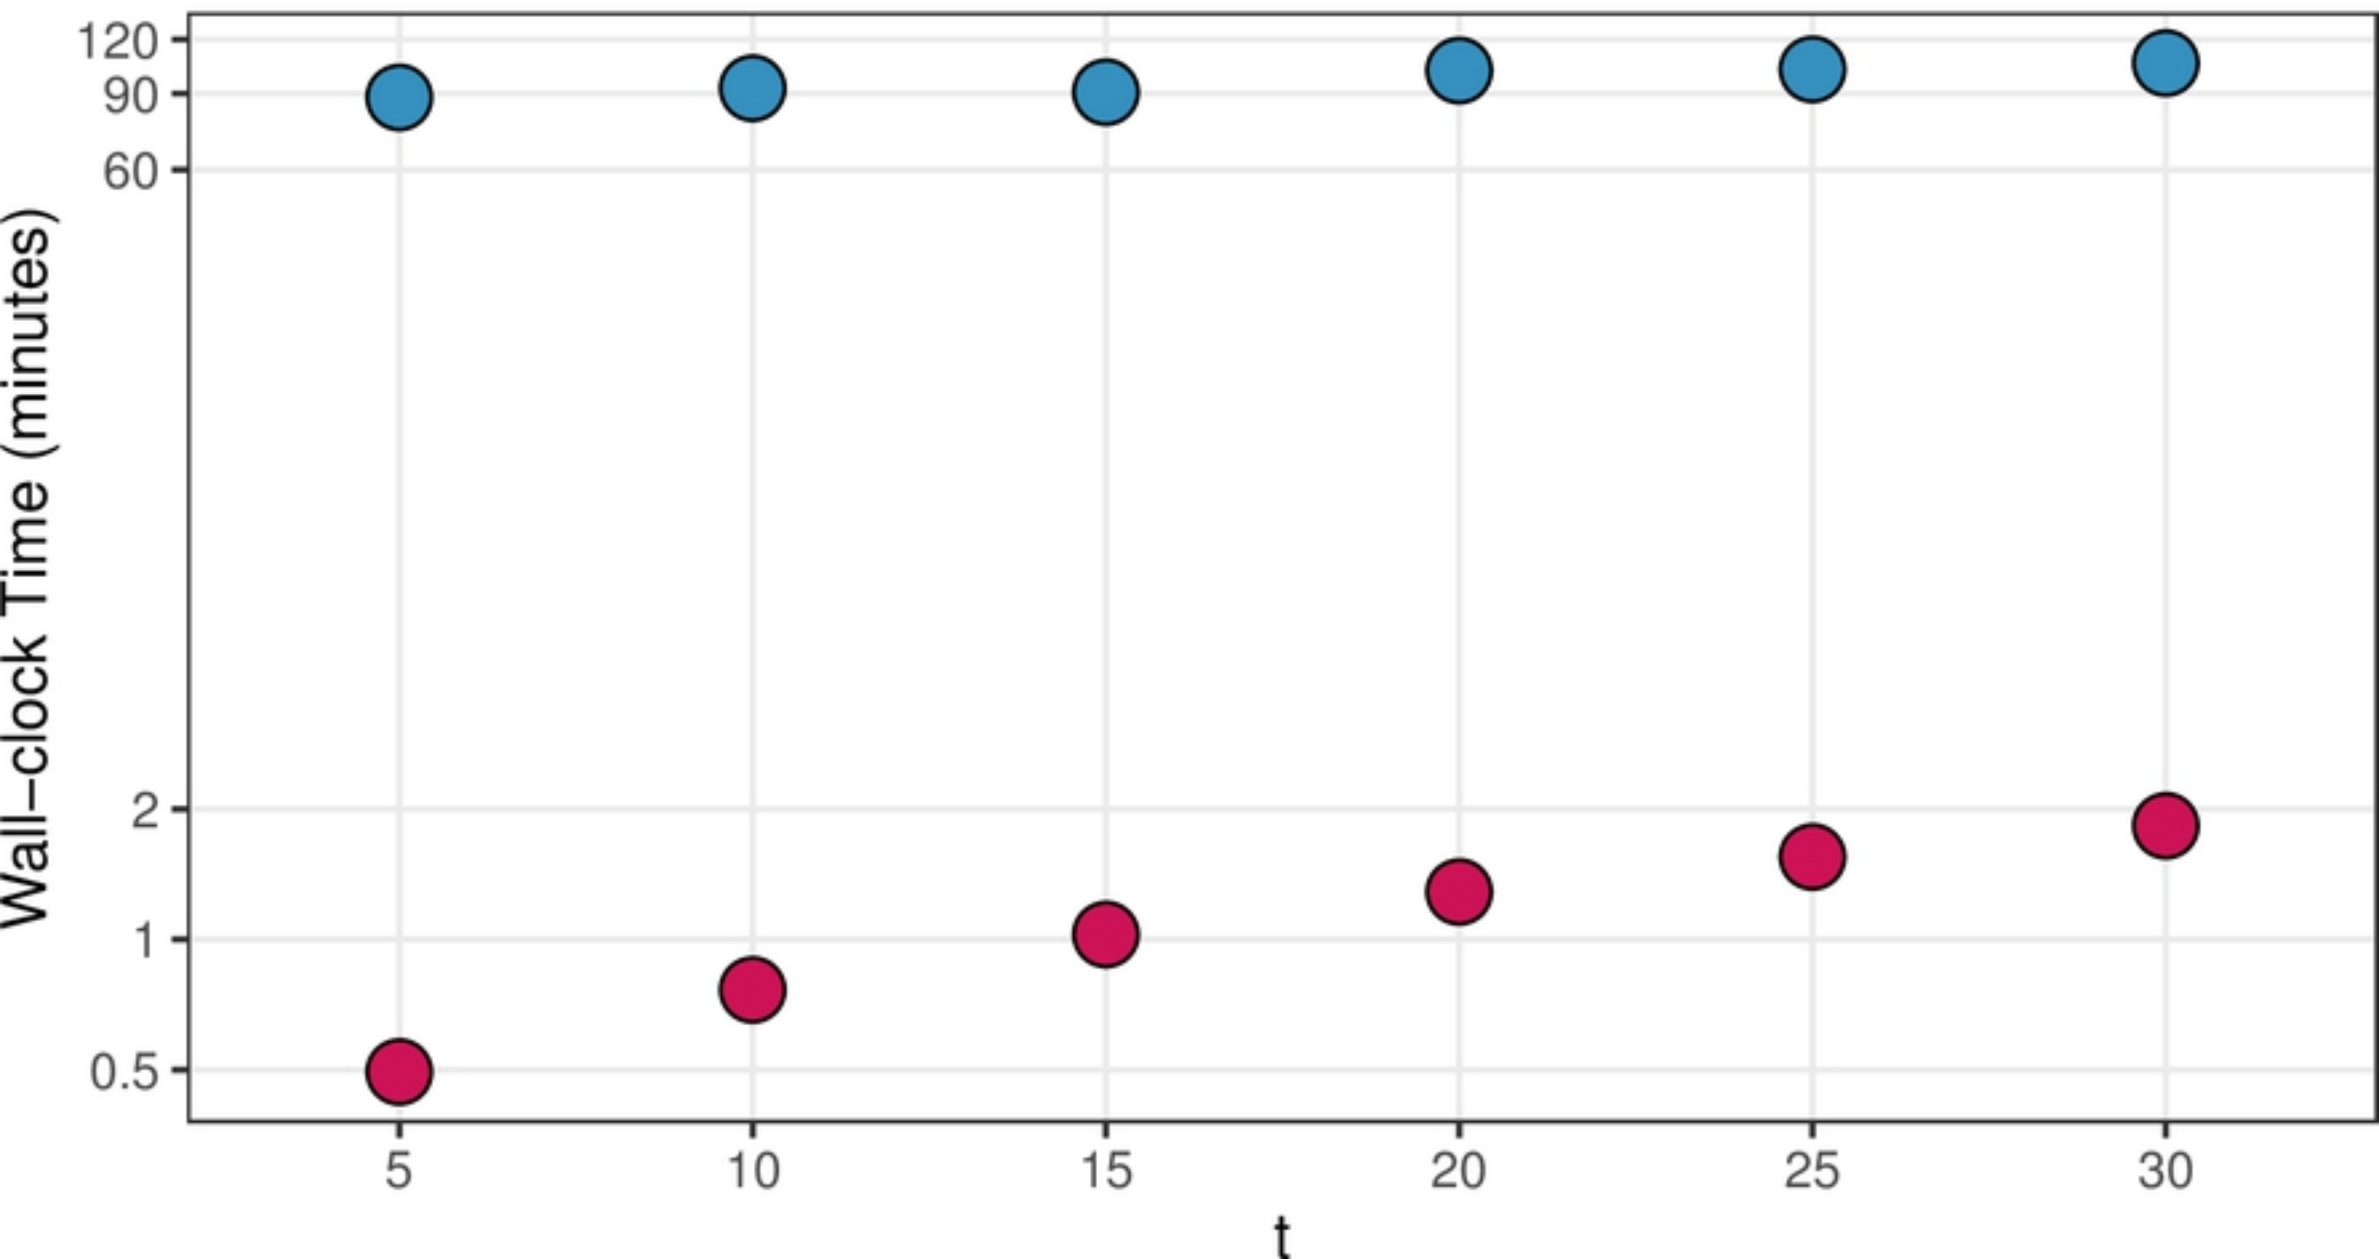



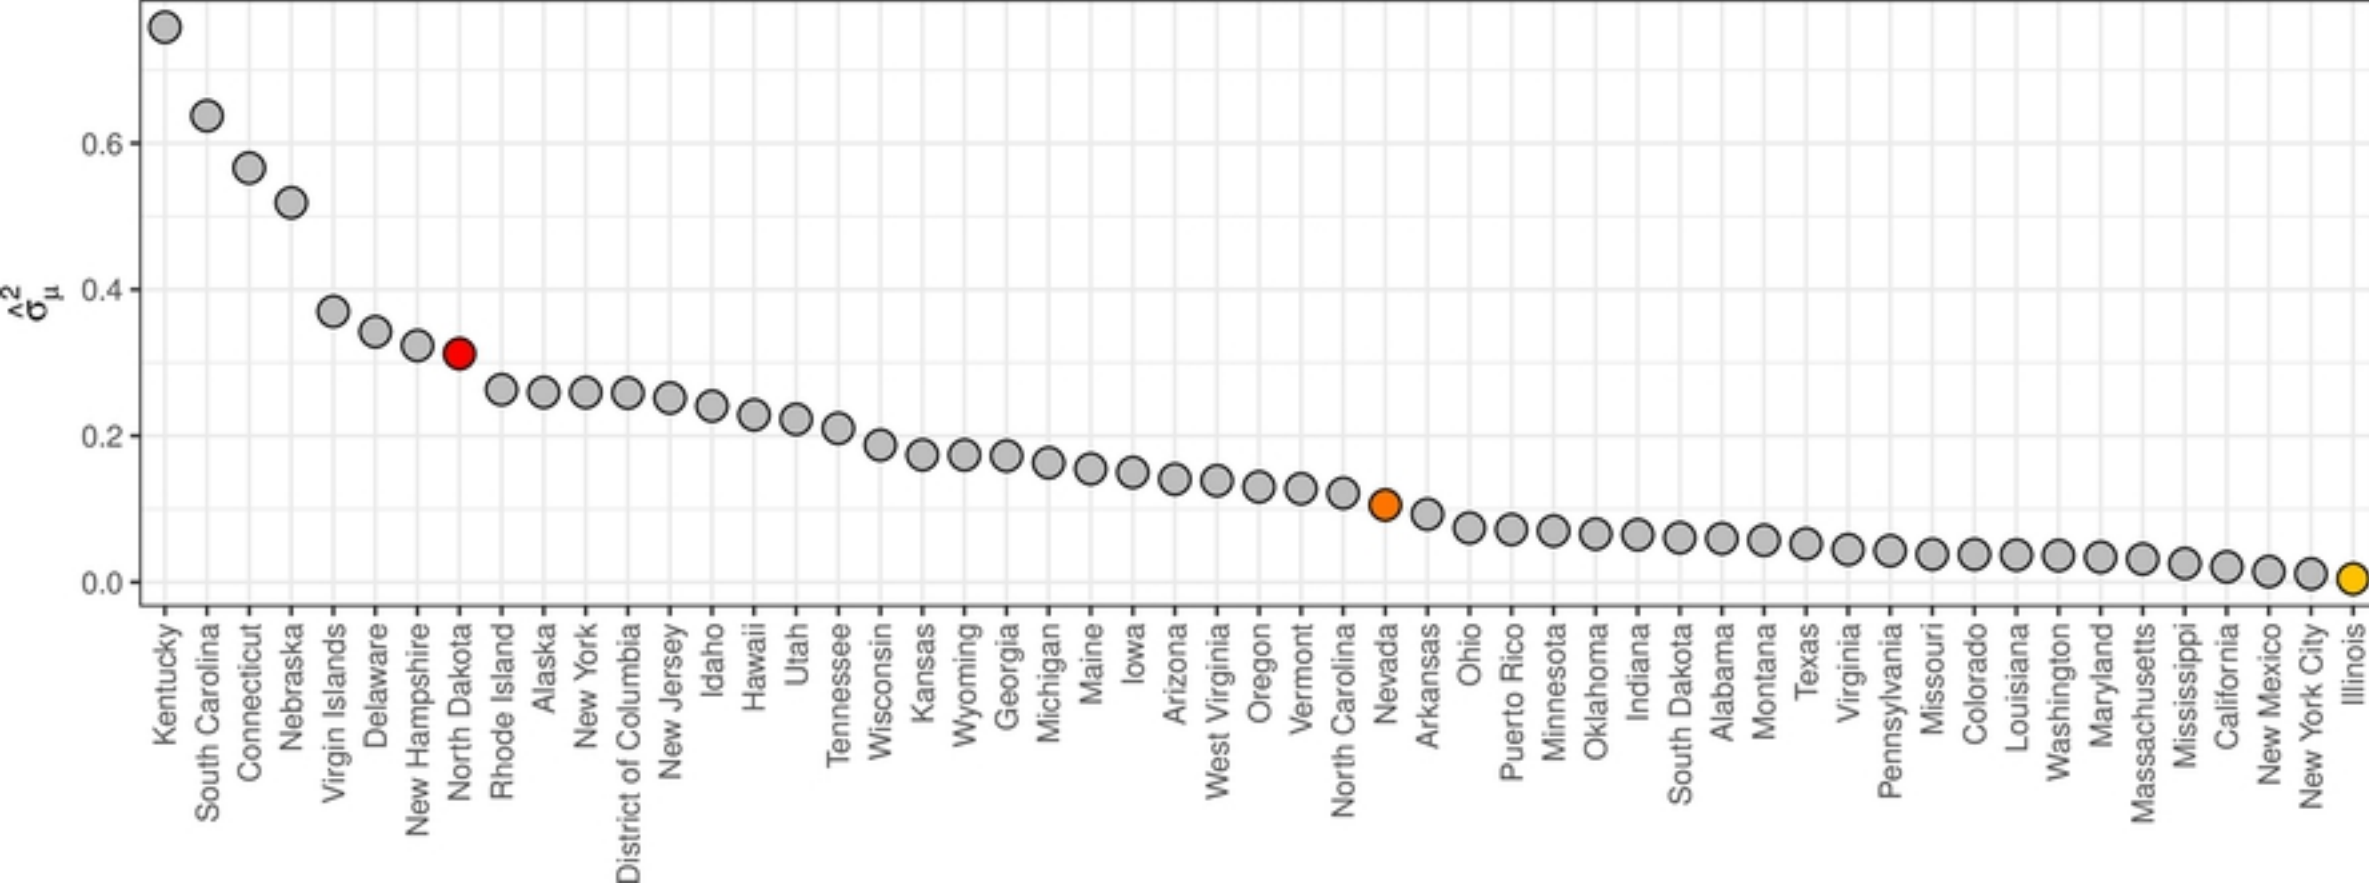

All States

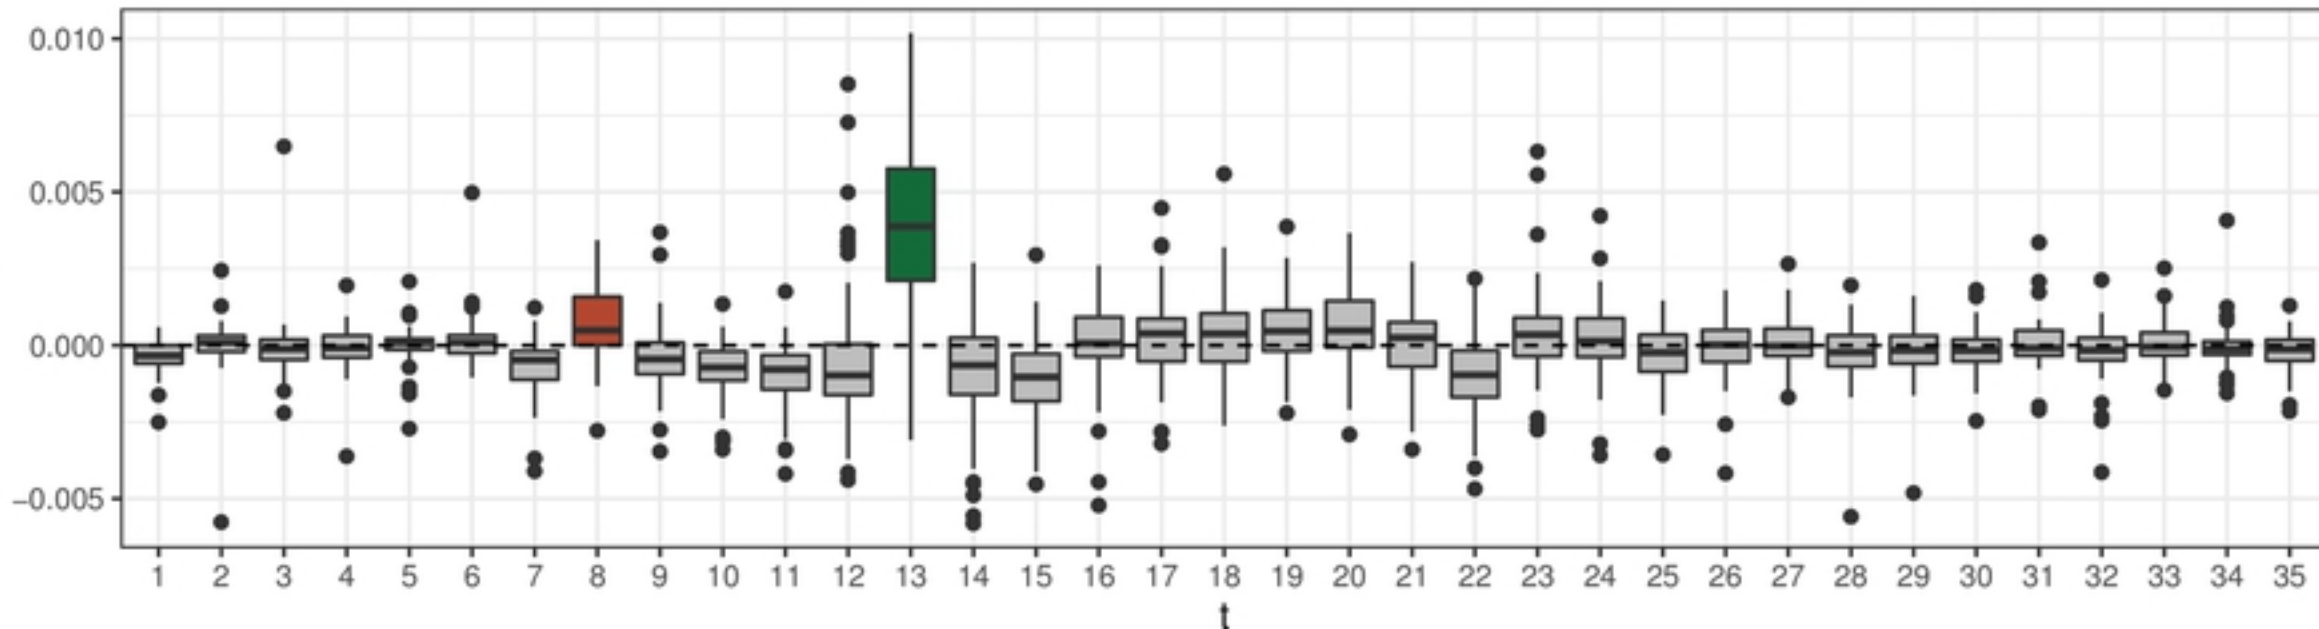

## Illinois

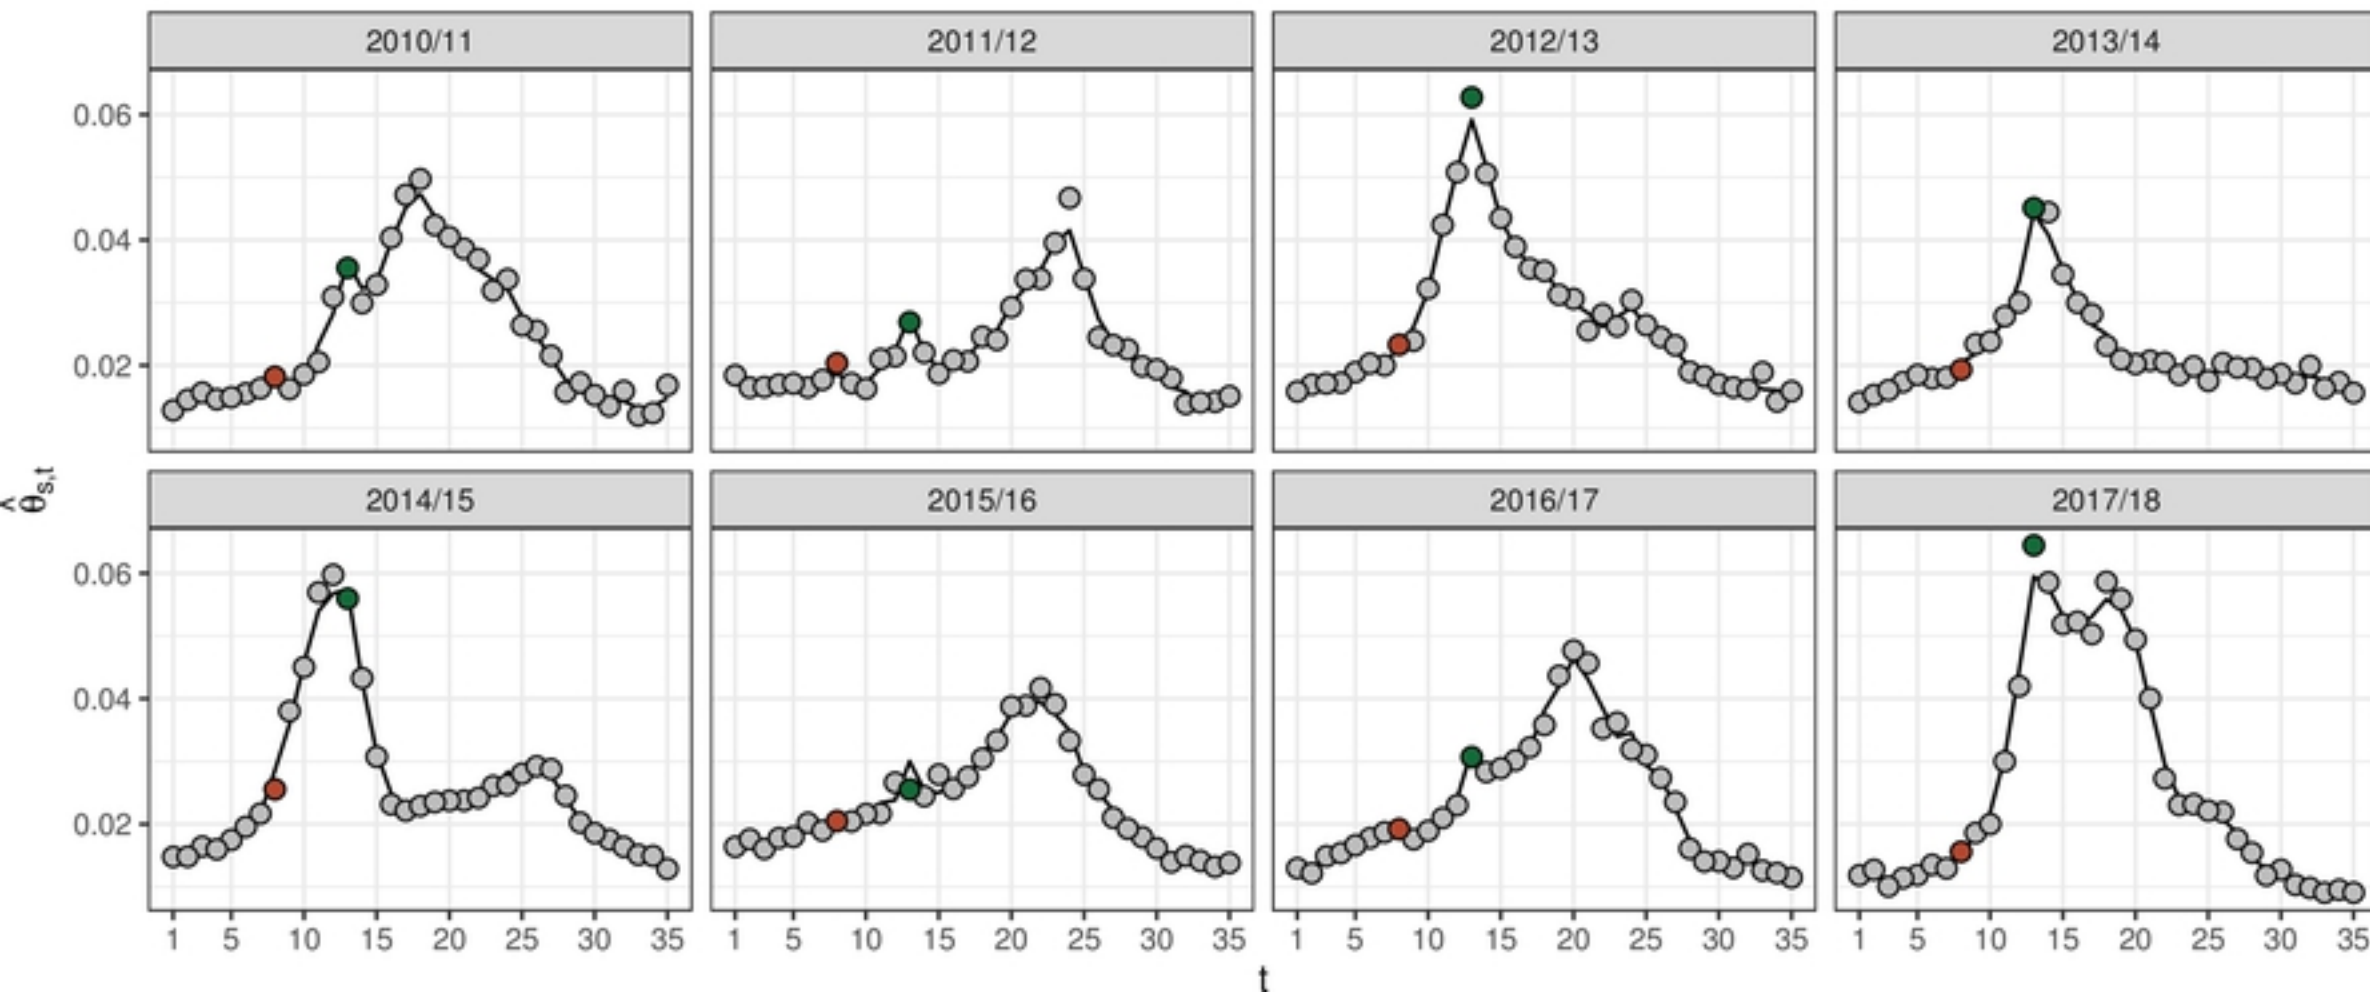

Source: http://biorxiv.org/content/10.1101/2021.01.06.425546v1.full.pdf
